# Supplementary material
Source: ML conference proceedings conference paper supplement (https://openaccess.thecvf.com/content/CVPR2026/html/Esfeh_Spectral_Conformal_Risk_CVPR_2026_paper.html)
Supplement: Supplementary file 1 [file Esfeh_Spectral_Conformal_Risk_CVPR_2026_supplemental.pdf]

# Spectral Conformal Risk Control: Distribution-Free Tail Guarantees via Bayesian Quadrature

## Supplementary Material

Table 6. Notation summary

| Symbol                | Description                                                                                                                                    |
|-----------------------|------------------------------------------------------------------------------------------------------------------------------------------------|
| $Z, Z_{1:n}$          | Data point(s); calibration sample of size $n$                                                                                                  |
| $\lambda \in \Lambda$ | Control parameter (e.g., threshold)                                                                                                            |
| $\ell(Z; \lambda)$    | Deployment loss at $Z$ with parameter $\lambda$                                                                                                |
| $K_\lambda(t)$        | Quantile function of loss distribution                                                                                                         |
| $\phi$                | Spectral density (nonnegative, nondecreasing, $\int_0^1 \phi = 1$ )                                                                            |
| $\rho_\phi(\lambda)$  | Spectral risk $\int_0^1 K_\lambda(t) \phi(t) dt$                                                                                               |
| $T_{(i)}$             | Order statistics of the PIT levels $U_i := F_\lambda(\ell_i(\lambda))$<br>(distributed as order statistics of $n$ i.i.d. $\text{Unif}(0, 1)$ ) |
| $W_i$                 | $\phi$ -mass spacing $\int_{T_{(i-1)}}^{T_{(i)}} \phi(t) dt$                                                                                   |
| $L_\phi^+(\lambda)$   | Upper envelope $\sum_{i=1}^{n+1} W_i \ell_i(\lambda)$                                                                                          |

### A. Mathematical Background

#### A.1. Probability, Quantiles, and Law-Invariant Coherent Risks

**Probability spaces and  $L^p$ .** Let  $(\Omega, \mathcal{F}, \mathbb{P})$  be a probability space with  $\mathcal{F}$  a  $\sigma$ -algebra and  $\mathbb{P}$  a probability measure. We say it is *atomless* if every  $A \in \mathcal{F}$  with  $\mathbb{P}(A) > 0$  contains a subset of strictly smaller positive probability. For  $1 \leq p \leq \infty$ , write  $L^p = L^p(\Omega, \mathcal{F}, \mathbb{P})$ ; equalities/inequalities are interpreted  $\mathbb{P}$ -a.s.

**Distribution and quantiles (loss convention).** For a real r.v.  $X$ , write  $F_X(x) = \mathbb{P}(X \leq x)$  (right-continuous). We use the left-continuous generalized inverse

$$F_X^{-1}(u) := \inf\{x \in \mathbb{R} : F_X(x) \geq u\}, \quad u \in (0, 1),$$

and adopt the *loss convention* (larger  $X$  means worse). This pins down  $\text{VaR}_u(X) := F_X^{-1}(u)$  at atoms.

**VaR and CVaR.** For  $X \in L^1$  and  $\alpha \in [0, 1)$ ,

$$\begin{aligned} \text{CVaR}_\alpha(X) &= \frac{1}{1-\alpha} \int_\alpha^1 \text{VaR}_u(X) du \\ &= \min_{t \in \mathbb{R}} \left\{ t + \frac{1}{1-\alpha} \mathbb{E}[(X-t)_+] \right\}. \end{aligned}$$

(The variational identity is due to [33].)

**Coherent, law-invariant, comonotone-additive.** A monetary risk measure  $\rho : \mathcal{X} \rightarrow \mathbb{R}$  (with  $\mathcal{X} \subseteq L^p$ ) is *coherent* if it satisfies monotonicity, subadditivity, positive homogeneity, and cash/translation invariance  $\rho(X+m) = \rho(X) + m$  (loss convention). It is

*law-invariant* if  $X \stackrel{d}{=} Y \Rightarrow \rho(X) = \rho(Y)$ . *Comonotone-additivity* means  $\rho(X+Y) = \rho(X) + \rho(Y)$  whenever  $X, Y$  are comonotone.

**Comonotonicity.** Random variables  $X, Y$  are *comonotone* iff there exist a r.v.  $Z$  and nondecreasing  $f, g$  with  $X = f(Z)$ ,  $Y = g(Z)$  a.s.; equivalently  $(X(\omega) - X(\omega'))(Y(\omega) - Y(\omega')) \geq 0$  for  $\mathbb{P} \otimes \mathbb{P}$ -a.s.  $(\omega, \omega')$ .

**Distortion (Choquet) risks.** Let  $g : [0, 1] \rightarrow [0, 1]$  be nondecreasing with  $g(0) = 0, g(1) = 1$ . For integrable  $X$ , define

$$\rho_g(X) = \int_{-\infty}^0 (g(\mathbb{P}(X \geq x)) - 1) dx + \int_0^\infty g(\mathbb{P}(X \geq x)) dx.$$

(Some authors use  $>$  rather than  $\geq$  in  $\bar{F}_X(x) = \mathbb{P}(X \geq x)$ ; the difference is immaterial unless at atoms.) If  $g$  is concave, then  $\rho_g$  is coherent and comonotone-additive (Choquet integral of a concave distortion); see, e.g., [42] for a modern treatment.

**Spectral risks and mixtures of CVaR.** A *spectral risk* measure is indexed by a nonnegative, nondecreasing, normalized  $\phi \in L^1([0, 1])$ :

$$\rho_\phi(X) = \int_0^1 \text{VaR}_u(X) \phi(u) du.$$

**PIT levels and order statistics.** For each  $\lambda$ , define the probability integral transform (PIT) levels  $U_i := F_\lambda(\ell_i(\lambda))$  from the calibration losses; under (A1)–(A2) these satisfy  $U_i \stackrel{\text{i.i.d.}}{\sim} \text{Unif}(0, 1)$ . Let  $T_{(1)} \leq \dots \leq T_{(n)}$  denote the order statistics of  $(U_1, \dots, U_n)$ ; their joint law is that of order statistics of  $n$  i.i.d. uniform draws, but they remain *dependent on the calibration sample*. We write  $T_{(0)} := 0$  and  $T_{(n+1)} := 1$ , and define  $W_i := \int_{T_{(i-1)}}^{T_{(i)}} \phi(t) dt$  so that  $L_\phi^+(\lambda) = \sum_{i=1}^{n+1} W_i \ell_i(\lambda)$  uses the same PIT-derived spacings. Every spectral risk is a *mixture of CVaRs*: there exists a probability measure  $\mu$  on  $[0, 1)$  such that

$$\begin{aligned} \rho_\phi(X) &= \int_0^1 \text{CVaR}_\alpha(X) \mu(d\alpha), \\ \phi(u) &= \int_{[0, u]} \frac{1}{1-\alpha} \mu(d\alpha) \quad \text{for } u \in [0, 1). \end{aligned}$$

This representation is due to [1] and [2].

**Kusuoka representation.** Assume  $(\Omega, \mathcal{F}, \mathbb{P})$  is atomless and  $\rho : L^p \rightarrow \mathbb{R}$  is law-invariant and coherent with the Fatou (Lebesgue) property. Then there exists a nonempty family  $\mathcal{M}$  of probability measures on  $[0, 1]$  such that

$$\rho(X) = \sup_{\mu \in \mathcal{M}} \int_0^1 \text{CVaR}_\alpha(X) \mu(d\alpha), \quad X \in L^p.$$

If in addition  $\rho$  is comonotone-additive, the supremum reduces to a single  $\mu$ ; hence  $\rho$  is spectral. For  $p < \infty$ , one can (and typically does) take  $\mu(\{1\}) = 0$  so finiteness holds for all  $X \in L^p$ . [21]; see [37] for an expository treatment.

## B. Proofs

In this section, we provide the proofs for all results in the main paper.

### B.1. Auxillary Lemmas

**Lemma B.1** (Measurability). *Fix  $\lambda \in \Lambda$  and assume  $\phi \in L^1([0, 1])$ . Then  $L_\phi^+(\lambda)$  is a real-valued random variable, and its  $(1 - \delta)$ -quantile  $Q_{1-\delta}(\lambda)$  is well-defined for every  $\delta \in (0, 1)$ .*

*Proof.* The order statistics  $(T_{(1)}, \dots, T_{(n)})$  lie in the simplex  $\{0 \leq t_{(1)} \leq \dots \leq t_{(n)} \leq 1\}$  and admit a joint density. Define  $F_\phi(t) = \int_0^t \phi(s) ds$ . Then  $F_\phi$  has bounded variation and is continuous (being the integral of an  $L^1$  function), and each spacing  $W_i = F_\phi(T_{(i)}) - F_\phi(T_{(i-1)})$  is a continuous function of  $(T_{(1)}, \dots, T_{(n)})$ . For fixed  $\lambda$ , with a tie-breaking rule (randomized or lexicographic) for equal calibration losses, the ordered losses  $\ell_{(i)}(\lambda)$  are measurable functions of the data. Therefore  $L_\phi^+(\lambda) = \sum_i W_i \ell_{(i)}(\lambda)$  is Borel measurable. Quantile maps of real-valued random variables are measurable, so  $Q_{1-\delta}(\lambda)$  is well-defined for every  $\delta \in (0, 1)$ .  $\square$

**Lemma B.2** (Monotonicity in  $\lambda$ ). *Assume (A6). If  $\lambda \mapsto \ell(z; \lambda)$  is non-increasing for every  $z$ , then  $\lambda \mapsto K_\lambda(t)$ ,  $\lambda \mapsto \rho_\phi(\lambda)$ , and  $\lambda \mapsto Q_{1-\delta}(\lambda)$  are non-increasing. If  $\lambda \mapsto \ell(z; \lambda)$  is non-decreasing, the same maps are non-decreasing. Consequently, when  $\lambda \mapsto \ell(z; \lambda)$  is non-increasing, the feasible set  $\{\lambda \in \Lambda : Q_{1-\delta}(\lambda) \leq \alpha\}$  is an up-set in the induced order on  $\Lambda_{\text{grid}}$ ; when  $\lambda \mapsto \ell(z; \lambda)$  is non-decreasing, the feasible set is instead a down-set in that order.*

*Proof.* Assume first that  $\lambda \mapsto \ell(z; \lambda)$  is non-increasing. Fix  $t$  and  $\lambda_1 \leq \lambda_2$ . Then  $\ell(z; \lambda_1) \geq \ell(z; \lambda_2)$  for every  $z$ , so  $F_{\lambda_1} \leq F_{\lambda_2}$  pointwise and therefore  $K_{\lambda_1}(t) \geq K_{\lambda_2}(t)$ . Integrating against  $\phi$  yields  $\rho_\phi(\lambda_1) \geq \rho_\phi(\lambda_2)$ , and applying the same argument to the envelope shows  $L_\phi^+(\lambda_1) \geq L_\phi^+(\lambda_2)$  and thus  $Q_{1-\delta}(\lambda_1) \geq Q_{1-\delta}(\lambda_2)$ . If  $\lambda \mapsto \ell(z; \lambda)$  is

non-decreasing, the inequalities reverse. Therefore, in the non-increasing case the feasible set is upward closed under the induced order on  $\Lambda_{\text{grid}}$ , while in the non-decreasing case it is downward closed.  $\square$

**Lemma B.3** (Antitonicity of Two-Parameter Control). *Under assumption (A6),  $\ell(\cdot; \tau, k)$  is antitone in  $(\tau, k)$  w.r.t. the partial order  $\preceq$ . Consequently, for any nonnegative spectral density  $\phi$ ,  $\rho_\phi(\tau, k)$  and  $Q_{1-\delta}(\tau, k)$  are antitone in  $(\tau, k)$ . Hence the feasible set  $\{(\tau, k) : Q_{1-\delta}(\tau, k) \leq \alpha\}$  is an up-set under  $\preceq$  (closed upward: if  $(\tau_1, k_1)$  is feasible and  $(\tau_1, k_1) \preceq (\tau_2, k_2)$ , then  $(\tau_2, k_2)$  is also feasible). Consequently the feasible frontier contains both the pure- $\tau$  and pure- $k$  optima, and the grid minimizer  $(\hat{\tau}, \hat{k})$  weakly dominates either single-parameter control: if  $\hat{\tau}_*$  and  $\hat{k}_*$  are the optimal single-parameter choices, then*

$$\mathbb{E}[|S(X; \hat{\tau}, \hat{k})|] \leq \min \{ \mathbb{E}[|S(X; \hat{\tau}_*, 1)|], \mathbb{E}[|S(X; 0, \hat{k}_*)|] \}.$$

*Proof.* Since  $\ell(z; \tau, k)$  is non-decreasing in  $\tau$  and non-increasing in  $k$ , increasing  $\tau$  or decreasing  $k$  increases the loss pointwise. Under our partial order  $(\tau_1, k_1) \preceq (\tau_2, k_2)$  iff  $\tau_1 \geq \tau_2$  and  $k_1 \leq k_2$ , so  $(\tau_1, k_1) \preceq (\tau_2, k_2)$  means that  $(\tau_2, k_2)$  has a smaller threshold and/or a larger  $k$ , hence smaller losses pointwise. This implies  $K_{(\tau_1, k_1)}(t) \geq K_{(\tau_2, k_2)}(t)$  for all  $t$ , and therefore  $\rho_\phi(\tau_1, k_1) \geq \rho_\phi(\tau_2, k_2)$  and  $Q_{1-\delta}(\tau_1, k_1) \geq Q_{1-\delta}(\tau_2, k_2)$ .

If  $(\tau_1, k_1)$  is feasible (i.e.,  $Q_{1-\delta}(\tau_1, k_1) \leq \alpha$ ) and  $(\tau_1, k_1) \preceq (\tau_2, k_2)$ , then  $Q_{1-\delta}(\tau_2, k_2) \leq Q_{1-\delta}(\tau_1, k_1) \leq \alpha$ , so  $(\tau_2, k_2)$  is also feasible. Thus the feasible set is an up-set. The pure- $\tau$  and pure- $k$  optima are feasible points in the 2D grid, so the optimal feasible pair cannot have larger set size than either.  $\square$

**Lemma B.4** (Deterministic bound). *Let  $X$  be a real-valued random variable and let  $c \in \mathbb{R}$  be constant. If  $X \geq c$  almost surely and  $\mathbb{P}(X \leq a) > 0$  for some  $a \in \mathbb{R}$ , then  $c \leq a$ . In particular, if  $c$  is deterministic and  $\mathbb{P}(c \leq a) > 0$ , then  $c \leq a$ .*

*Proof.* If  $c > a$ , then on the event  $\{X \leq a\}$  we would have  $X < c$ , contradicting  $X \geq c$  almost surely. Hence  $\mathbb{P}(X \leq a) > 0$  is impossible when  $c > a$ , so necessarily  $c \leq a$ .  $\square$

### B.2. Envelope

**Theorem 3.1** (Envelope inequality). *Under assumptions (A1)–(A6), for any  $\lambda \in \Lambda$ , the spectral risk of the induced distribution is bounded above by the upper envelope:*

$$\rho_\phi(\lambda) \leq L_\phi^+(\lambda). \quad (10)$$

*Moreover, among all nondecreasing quantile functions  $K$  that are compatible with the observed calibration order*

constraints (i.e., satisfy  $K(T_{(i)}) \leq \ell_{(i)}(\lambda)$  for all  $i$ ), the supremum of  $\int_0^1 K(t)\phi(t) dt$  is equal to  $L_\phi^+(\lambda)$  and is attained by the piecewise-constant choice

$$K_\lambda^*(t) = \sum_{i=1}^{n+1} \ell_{(i)}(\lambda) \mathbb{1}_{(T_{(i-1)}, T_{(i)})}(t). \quad (11)$$

*Proof.* Let  $K_\lambda$  be any nondecreasing quantile function compatible with the calibration order constraints, i.e., such that  $K_\lambda(T_{(i)}) \leq \ell_{(i)}(\lambda)$  for all  $i$ . Then, by monotonicity, for any  $t \in [T_{(i-1)}, T_{(i)}]$  we have  $t \leq T_{(i)}$  and hence

$$K_\lambda(t) \leq K_\lambda(T_{(i)}) \leq \ell_{(i)}(\lambda).$$

Integrating against  $\phi$  yields the pathwise inequality

$$\begin{aligned} \rho_\phi(\lambda) &= \int_0^1 K_\lambda(t)\phi(t) dt \\ &\leq \sum_{i=1}^{n+1} \ell_{(i)}(\lambda) (F_\phi(T_{(i)}) - F_\phi(T_{(i-1)})) \\ &= L_\phi^+(\lambda), \end{aligned}$$

which proves the upper bound. For the equality condition, for any fixed  $\lambda \in \Lambda$ , we define

$$K_\lambda^*(t) = \sum_{i=1}^{n+1} \ell_{(i)}(\lambda) \mathbb{1}_{(T_{(i-1)}, T_{(i)})}(t).$$

Note that this constructed  $K_\lambda^*$  depends on the *same random order statistics*  $T_{(i)}$  used to define  $W_i$ . With probability one in the draw of the order statistics this function is nondecreasing and matches the calibration losses at the observed ranks. Moreover,

$$\int_0^1 K_\lambda^*(t)\phi(t) dt = L_\phi^+(\lambda),$$

so  $K_\lambda^*$  is the *least-favorable* quantile function among those compatible with the order constraints (this is the same idea used by CRC/RCPS envelopes [5, 7]). Therefore  $L_\phi^+(\lambda)$  is tight: it is the least upper bound compatible with the calibration order constraints.  $\square$

### B.3. Classical Empirical Quantile Control

**Proposition 3.1** (Empirical quantile control). *For any fixed  $\lambda \in \Lambda$ , let  $\widehat{Q}_{1-\delta}(\lambda)$  denote the empirical  $(1 - \delta)$ -quantile of  $\{L_{\phi, m}^+(\lambda)\}_{m=1}^M$  obtained in Algorithm 1. For any  $\eta$  with  $0 < \eta \leq \delta$ , the sharp DKW inequality [26] yields*

$$\mathbb{P}\{Q_{1-\delta}(\lambda) \leq \widehat{Q}_{1-\delta+\eta}(\lambda)\} \geq 1 - 2 \exp(-2M\eta^2), \quad (12)$$

where  $\widehat{Q}_{1-\delta+\eta}(\lambda)$  is the empirical quantile at level  $(1 - \delta + \eta)$ . Consequently, choosing  $\eta = \sqrt{\frac{\log(2/\gamma)}{2M}}$  guarantees that, for this  $\lambda$ , the underestimation event  $Q_{1-\delta}(\lambda) > \widehat{Q}_{1-\delta+\eta}(\lambda)$  occurs with probability at most  $\gamma$ , provided this choice satisfies  $\eta \leq \delta$ .

*Proof.* Let  $F_\lambda$  be the cumulative distribution function of  $L_\phi^+(\lambda)$  and  $\widehat{F}_{\lambda, M}$  the empirical distribution function formed by the  $M$  Monte Carlo samples. The sharp DKW inequality [26] states that  $\mathbb{P}\left[\sup_x |\widehat{F}_{\lambda, M}(x) - F_\lambda(x)| > \eta\right] \leq 2e^{-2M\eta^2}$ . On the complement event we have  $\widehat{F}_{\lambda, M}(Q_{1-\delta}(\lambda)) \geq F_\lambda(Q_{1-\delta}(\lambda)) - \eta \geq 1 - \delta - \eta$ , so the empirical  $(1 - \delta + \eta)$ -quantile dominates  $Q_{1-\delta}(\lambda)$ . Rearranging the DKW bound gives the explicit choice of  $\eta$ .  $\square$

### B.4. Binomial LCB Guarantee

In this subsection we formalize our binomial LCB acceptance rule.

**Idealised vs. implemented Monte Carlo.** All guarantees below assume an oracle that produces i.i.d. draws  $L_{\phi, 1}^+(\lambda), \dots, L_{\phi, M}^+(\lambda) \sim \text{Law}(L_\phi^+(\lambda))$  for each  $\lambda$ . Our implementation approximates this oracle with the proxy  $\widetilde{L}_\phi^+(\lambda)$  built from i.i.d. uniform order statistics; this affects only numerical approximation, not the logical form of the guarantees. Fix  $\lambda$  and  $\alpha$ , and define the non-exceedance probability

$$q(\lambda; \alpha) := \mathbb{P}(L_\phi^+(\lambda) \leq \alpha).$$

Given  $M$  i.i.d. draws from  $\text{Law}(L_\phi^+(\lambda))$ , form the binomial count

$$S_\lambda(\alpha) = \sum_{m=1}^M \mathbb{1}\{L_{\phi, m}^+(\lambda) \leq \alpha\} \sim \text{Binomial}(M, q(\lambda; \alpha)).$$

We compute the Clopper–Pearson lower bound  $\underline{q}_\lambda$  at level  $(1 - \gamma)$ . To verify whether  $q(\lambda; \alpha) \geq 1 - \delta$  (equivalently  $Q_{1-\delta}(\lambda) \leq \alpha$ ), our acceptance rule returns “Accept” if  $\underline{q}_\lambda \geq 1 - \delta$ , and returns “Inconclusive” otherwise. We have the following confidence guarantee.

**Proposition B.1** (Binomial LCB validity). *If  $q(\lambda; \alpha) < 1 - \delta$ , then the acceptance rule accepts with probability  $\leq \gamma$ . Equivalently, whenever the acceptance rule accepts, it is wrong with probability  $\leq \gamma$ .*

*Proof.* The Clopper–Pearson lower bound  $\underline{q}_\lambda$  at level  $(1 - \gamma)$  satisfies

$$\mathbb{P}(q(\lambda; \alpha) \geq \underline{q}_\lambda) \geq 1 - \gamma,$$

where  $q(\lambda; \alpha) = \mathbb{P}(L_\phi^+(\lambda) \leq \alpha)$ . If we actually have  $q(\lambda; \alpha) < 1 - \delta$ , then

$$\mathbb{P}[\text{Accept}] = \mathbb{P}(\underline{q}_\lambda \geq 1 - \delta) \leq \mathbb{P}(\underline{q}_\lambda > q(\lambda; \alpha)) \leq \gamma,$$

as desired.  $\square$

Note that since  $q_\lambda$  is a (high-probability) lower bound, we cannot conclude anything if it is less than  $1 - \delta$ , so we return “Inconclusive” in the acceptance rule in that case.

As a final remark, note that  $Q_{1-\delta}(\lambda)$  and  $\alpha$  are deterministic once  $\lambda$  is fixed; all probabilities in the verification are solely over the Monte Carlo draws used to form  $q_\lambda$ .

## B.5. Uniform-over-Grid Monte Carlo Validity

**Proposition B.2** (Uniform-over-grid Monte Carlo validity). *Fix  $\alpha, \delta$  and a finite grid  $\mathcal{H} \subset \Lambda$  (or  $\mathcal{H} \subset \Lambda \times \Phi$  for multiple spectral densities). For each  $h \in \mathcal{H}$ , define*

$$q(h; \alpha) := \mathbb{P}(L_\phi^+(h) \leq \alpha),$$

$$Q_{1-\delta}(h) := \inf\{a \in \mathbb{R} : \mathbb{P}(L_\phi^+(h) \leq a) \geq 1 - \delta\}.$$

Run Algorithm 1 with one-sided binomial LCBs at level  $(1 - \gamma/|\mathcal{H}|)$  for each  $h \in \mathcal{H}$ . Then, with probability  $\geq 1 - \gamma$  over Monte Carlo randomness,

$$\forall h \in \mathcal{H} : \quad \underline{q}_h \geq 1 - \delta \Rightarrow Q_{1-\delta}(h) \leq \alpha.$$

Hence the data-dependent choice  $\hat{h}$  is valid.

*Proof.* Proposition B.1 guarantees that, for each fixed  $h \in \mathcal{H}$ , the event  $\{\underline{q}_h \geq 1 - \delta \text{ while } q(h; \alpha) < 1 - \delta\}$  has probability at most  $\gamma/|\mathcal{H}|$  (because the Clopper–Pearson bound for  $h$  is computed at level  $1 - \gamma/|\mathcal{H}|$ ). A union bound shows that with probability at least  $1 - \gamma$  over the Monte Carlo randomness, no such event occurs for any  $h \in \mathcal{H}$ . On that high-probability event,  $\underline{q}_h \geq 1 - \delta$  implies  $q(h; \alpha) \geq 1 - \delta$ , which is equivalent to  $Q_{1-\delta}(h) \leq \alpha$  by definition of quantiles. Since  $\hat{h}$  is chosen among the accepted grid points, it inherits the same guarantee. (An alternative approach uses anytime-valid e-processes [32] to provide uniform guarantees without Bonferroni adjustment, useful when  $|\mathcal{H}|$  is very large. In the absence of this change, we describe our guarantees as *familywise-valid over a fixed finite grid*.)  $\square$

## B.6. BQ-SRC Algorithm Correctness

**Theorem 3.2** (Calibration-time risk control). *Under assumptions (A1) - (A6), suppose we follow the oracle version of Algorithm 1 and assume additionally that*

$$\{\lambda \in \Lambda_{\text{grid}} : \underline{q}_\lambda \geq 1 - \delta\} \neq \emptyset, \quad (17)$$

and deploy

$$\hat{\lambda}_\phi := \min\{\lambda \in \Lambda_{\text{grid}} : \underline{q}_\lambda \geq 1 - \delta\}, \quad (18)$$

where  $q_\lambda$  is the Clopper–Pearson lower bound computed at level  $(1 - \gamma/|\Lambda_{\text{grid}}|)$ . Then, with probability at least  $1 - \gamma$  over the Monte Carlo randomness used to form the bounds, we can certify that the selected  $\hat{\lambda}_\phi$  satisfies  $\rho_\phi(\hat{\lambda}_\phi) \leq \alpha$ .

*Proof.* Fix the calibration sample and associated ordered losses  $\{\ell_{(i)}(\lambda)\}_{i=1}^n$ . By Theorem 3.1 we have the almost-sure bound

$$\rho_\phi(\lambda) \leq L_\phi^+(\lambda) \quad \text{for every } \lambda \in \Lambda_{\text{grid}}. \quad (21)$$

For  $\alpha \in \mathbb{R}$  and  $\lambda \in \Lambda_{\text{grid}}$ , write

$$q(\lambda; \alpha) := \mathbb{P}(L_\phi^+(\lambda) \leq \alpha),$$

$$S_\lambda(\alpha) := \sum_{m=1}^M \mathbb{1}\{L_{\phi,m}^+(\lambda) \leq \alpha\},$$

where  $L_{\phi,1}^+(\lambda), \dots, L_{\phi,M}^+(\lambda) \stackrel{\text{i.i.d.}}{\sim} \text{Law}(L_\phi^+(\lambda))$ . Then  $S_\lambda(\alpha) \sim \text{Binomial}(M, q(\lambda; \alpha))$ .

Proposition B.2 (applied with per-grid Clopper–Pearson level  $1 - \gamma/|\Lambda_{\text{grid}}|$ ) implies that, with probability at least  $1 - \gamma$  over the Monte Carlo draws used to form the  $q_\lambda$ ’s,

$$\underline{q}_\lambda \geq 1 - \delta \implies q(\lambda; \alpha) \geq 1 - \delta \quad \text{for all } \lambda \in \Lambda_{\text{grid}}.$$

On this high-probability event, the selected  $\hat{\lambda}_\phi$  satisfies

$$\mathbb{P}(L_\phi^+(\hat{\lambda}_\phi) \leq \alpha) = q(\hat{\lambda}_\phi; \alpha) \geq 1 - \delta > 0.$$

Combining this with (21) at  $\lambda = \hat{\lambda}_\phi$ , Lemma B.4 yields

$$\rho_\phi(\hat{\lambda}_\phi) \leq \alpha.$$

The conclusion is deterministic; the Monte Carlo randomness only governs whether the event  $q(\hat{\lambda}_\phi; \alpha) \geq 1 - \delta$  holds, and this event fails with probability at most  $\gamma$ .  $\square$

## C. Batch Multivald Extension

Let  $\mathcal{G}$  be a finite collection of (possibly intersecting) *batch groups* in feature space (e.g., bins of prediction entropy) and  $\mathcal{A} \subset [0, 1]$  a finite grid of risk targets.

Let  $X$  denote the feature component of  $Z = (X, Y)$ . For each  $(\lambda, g, a) \in \Lambda \times \mathcal{G} \times \mathcal{A}$ , define the group-conditional non-exceedance probability

$$q_g(\lambda; a) := \mathbb{P}\left[L_{\phi,g}^+(\lambda) \leq a \mid X \in g\right].$$

Run the same MC test with per-hypothesis level  $\gamma/(|\Lambda||\mathcal{G}||\mathcal{A}|)$  and accept  $(\lambda, a)$  as valid for group  $g$  if the CP lower bound  $\underline{q}_g(\lambda; a) \geq 1 - \delta$ . Then

$$\mathbb{P}\left[\exists \lambda, g, a : \text{accept but } q_g(\lambda; a) < 1 - \delta\right] \leq \gamma,$$

so with probability at least  $1 - \gamma$ , all accepted triples are simultaneously valid.

**Remark.** This is a finite-grid, calibration-conditional guarantee. For broader multivald conformal coverage and constructions, see [17].

## D. Binomial Intervals Used in Our Tests

Given  $S \sim \text{Binom}(M, p)$ :

**Clopper-Pearson (exact) one-sided LCB at level  $1 - \gamma$ :**

$$\text{LCB}_\gamma(p) = \text{Beta}^{-1}(\gamma; S, M - S + 1).$$

**Wilson score (display only):**

Let  $z = z_{1-\gamma}$ ; then the two-sided Wilson interval is

$$\frac{\hat{p} + \frac{z^2}{2M} \pm z \sqrt{\frac{\hat{p}(1-\hat{p})}{M} + \frac{z^2}{4M^2}}}{1 + \frac{z^2}{M}}, \quad \hat{p} = \frac{S}{M}.$$

We use Clopper-Pearson in proofs and Wilson for visualization, following recommendations in [8].

## E. Experimental Protocol Details

### E.1. Implementation details

We implement BQ-SRC and all baselines in a numerically stable, double-precision setting, using vectorized linear algebra for envelope evaluation and Monte Carlo certification. Calibration, Monte Carlo, and test-time evaluation all use the same loss definitions and rescaling (losses are always mapped to  $[0, 1]$  before applying spectral risk functionals).

**Envelope construction.** Given a calibration set of  $n$  examples, we sort the calibration losses for each candidate parameter  $\lambda$  to obtain  $\ell_{(1)}(\lambda) \leq \dots \leq \ell_{(n)}(\lambda)$  and append  $\ell_{(n+1)}(\lambda) = 1$ . For a given spectral density  $\phi$  with antiderivative  $F_\phi(u) = \int_0^u \phi(s) ds$ , we idealize sampling from the PIT order statistics  $T_{(i)}$  introduced above. In the implementation we approximate these PIT spacings by drawing  $M$  i.i.d. uniform samples on  $[0, 1]$ , sorting them to obtain order statistics  $T_{(1)}, \dots, T_{(n)}$ , and defining spacings

$$W_i = F_\phi(T_{(i)}) - F_\phi(T_{(i-1)}), \quad T_{(0)} := 0.$$

The upper envelope is then

$$L_\phi^+(\lambda) = \sum_{i=1}^{n+1} W_i \ell_{(i)}(\lambda),$$

and the calibration-conditional guarantee in Theorem 3.1 is enforced exactly in this discretized form. We reuse the same set of order statistics  $T_{(1:n)}$  across grid points  $\lambda$  in a given experiment to reduce Monte Carlo variance, but  $T_{(1:n)}$  is always independent of the calibration data.

**Spectral densities.** All spectra satisfy  $\phi \geq 0$ , are non-decreasing, and integrate to 1:

- **Mean risk:**  $\phi(t) \equiv 1$ .
- **CVaR $_\beta$**  ( $\beta \in [0, 1)$ ):  $\phi(t) = \frac{1}{1-\beta} \mathbf{1}\{t > \beta\}$ .

- **Mixtures:** for mix 95/5 we use

$$\phi_{\text{mix95/5}}(t) = 0.95 \cdot 1 + 0.05 \cdot \frac{1}{1-0.9} \mathbf{1}\{t > 0.9\},$$

and analogously for mix 90/10 and mix 85/15 (replacing the outer weight and CVaR weight accordingly). These spectra put most mass on the mean risk while allocating a small fraction of mass to a CVaR $_{0.9}$ -type tail.

- **Ramped tails:** for ramped-tail spectra, we use a density that is flat on  $[0, \beta]$  and increases as a power function on  $(\beta, 1]$ , with parameters  $(\beta, \kappa)$  (e.g.,  $\beta = 0.7, \kappa = 2.0$ ) chosen so that  $\int_0^1 \phi = 1$  and  $\phi$  is non-decreasing.

These closed-form densities are used consistently across all experiments and in the proofs in Appendix A.1.

**Monte Carlo certification and binomial LCBs.** For each candidate  $\lambda$  and target risk threshold  $\alpha$ , we approximate the non-exceedance probability

$$q(\lambda; \alpha) = \Pr\{L_\phi^+(\lambda) \leq \alpha\}$$

using  $M$  independent Monte Carlo draws of the envelope. In all main experiments we set

$$M = 5000, \quad \gamma = 10^{-3}, \quad 1 - \delta = 0.95,$$

and we consider ablations with  $M \in \{2000, 5000, 10000\}$  and  $\delta \in \{0.05, 0.1\}$  (see Figure 3 and Figure 7). For each  $(\lambda, \alpha)$  we form a success count

$$S_\lambda(\alpha) = \sum_{m=1}^M \mathbf{1}\{L_{\phi,m}^+(\lambda) \leq \alpha\} \sim \text{Binomial}(M, q(\lambda; \alpha)),$$

and compute the one-sided  $(1 - \gamma_{\text{per-test}})$  Clopper-Pearson lower confidence bound

$$\underline{q}_\lambda = \text{Beta}^{-1}(\gamma_{\text{per-test}}; S_\lambda(\alpha), M - S_\lambda(\alpha) + 1).$$

We accept  $\lambda$  if  $\underline{q}_\lambda \geq 1 - \delta$ , which is equivalent to certifying that the  $(1 - \delta)$ -quantile  $Q_{1-\delta}(\lambda)$  of  $L_\phi^+(\lambda)$  is at most  $\alpha$  with confidence at least  $1 - \gamma_{\text{per-test}}$ .

To obtain uniform control over finite grids  $\mathcal{H}$  (e.g.,  $\Lambda_{\text{grid}}$  or a two-parameter grid  $\mathcal{G}$ ), we apply a Bonferroni-adjusted level

$$\gamma_{\text{per-test}} = \gamma / |\mathcal{H}|$$

and run the same binomial LCB test for each grid point in  $\mathcal{H}$ . Proposition B.2 shows that, with probability at least  $1 - \gamma$ , all accepted grid points simultaneously satisfy  $Q_{1-\delta}(\lambda) \leq \alpha$ . In the batch multivald extension,  $\delta$  is deliberately kept global rather than Bonferroni-split across groups; validity is obtained by a finite union bound over discretized exceedance thresholds instead (see the discussion under Batch Multivald Calibration).

**Grid search and two-parameter control.** For single-parameter control, we discretize the  $\lambda$ -axis into  $|\Lambda_{\text{grid}}| \in \{128, 256, 512\}$  evenly spaced thresholds on an interval  $[\lambda_{\min}, \lambda_{\max}]$  with  $\lambda_{\min}$  typically in  $\{0.30, 0.35\}$  for COCO and chosen to cover the relevant operating range in other tasks (e.g., from 0 up to a maximum score or interval width). For two-parameter  $(\tau, k)$  control we form a rectangular grid  $\mathcal{G}$  with

$$\tau \in \{0, \Delta_\tau, 2\Delta_\tau, \dots, \tau_{\max}\}, \quad k \in \{1, 2, \dots, k_{\max}\},$$

with  $\tau$ -grid size 64 and  $k_{\max} = 15$  in the COCO experiments. For each grid point we evaluate the envelope, run the binomial LCB test described above, and then select among the accepted grid points the one with smallest empirical efficiency metric (interval length, prediction-set size, or analogous quantity), consistent with the monotonicity properties in Proposition B.3.

**Randomization and shared randomness.** Across all experiments we fix a base random seed for each trial, and we reuse the same calibration/test split and Monte Carlo order statistics across methods within that trial. This ensures that differences between methods are not driven by differences in the underlying randomness. All reported means and confidence intervals in the tables are empirical averages and binomial or  $t$ -intervals computed over the stated number of independent trials (e.g., 10,000 trials for synthetic  $n = 10$ , 2,000 for  $n = 200$ , 1,000 for heteroskedastic and COCO, and 10 for segmentation).

## E.2. MS-COCO Protocol

For MS-COCO multilabel classification experiments:

- **Dataset:** MS-COCO 2017 splits [23] with standard pre-processing
- **Base model:** Following [39], We adopt the logits of a ResNet-based architecture with sigmoid head outputting scores over 80 classes
- **Training:** Standard ImageNet pretraining with COCO fine-tuning (standard recipe)
- **Calibration/test sizes:** Calibration set size  $n = 1000$ ; test set uses standard COCO splits
- **Common hyperparameters:**  $\alpha = 0.1$  (sweeps use  $\alpha \in \{0.05, 0.1, 0.2\}$ ),  $1 - \delta = 0.95$  ( $\delta = 0.05$ , sweeps use  $\delta \in \{0.05, 0.1\}$ ),  $M \in \{2000, 5000, 10000\}$  Monte Carlo draws (main results use  $M = 5000$ ),  $\gamma = 10^{-3}$
- **Quantile method:** Binomial LCB (Clopper-Pearson or Wilson) [10, 43]
- **Sampling:** Antithetic sampling mode for variance reduction
- **Temperature scaling:** Applied when specified (see temperature ablation experiments); uses calibration set with step size 0.05 and max iterations 200 when explicitly configured [15]

### • Grid sizes:

- Single-parameter:  $|\Lambda_{\text{grid}}| \in \{128, 256, 512\}$  with minimum threshold  $\lambda_{\min} \in \{0.30, 0.35\}$  (main results use  $\lambda_{\min} = 0.30$ ,  $|\Lambda_{\text{grid}}| = 256$ )
- Two-parameter  $(\tau, k)$ :  $\tau$  grid size 64 ( $\tau \in [0, 0.9]$  or  $[0, 1]$  depending on experiment),  $k \in \{1, \dots, 15\}$  (step size 1,  $k_{\min} = 1$  when specified)

• **Spectral densities  $\phi$ :** Uniform (mean), CVaR<sub>0.9</sub>, CVaR<sub>0.95</sub>, mix 95/5 (95% mean risk + 5% CVaR<sub>0.9</sub>), mix 90/10, mix 85/15, and ramped tail variants (ramp  $\beta = 0.7$ ,  $\kappa = 2.0$ )

• **Batch multivald:** Number of strata  $|\mathcal{G}| \in \{8, 16\}$ ; stratification by prediction entropy or confidence score

• **Shift-aware weighting:** Uses inverse-positive-count importance weights for covariate shift experiments

• **Number of trials:** 1000 trials per experiment configuration

• **Seeds:** Random seeds fixed across methods for fair comparison; code repository will be made available

## E.3. Synthetic benchmark protocol

For the synthetic spectral risk-control experiments:

- **Loss model:** We draw  $U \sim \text{Unif}(0, 1)$  and define a scaled count loss  $\ell(z; \lambda) = \mathbf{1}\{U > \lambda\}$ , which induces a simple monotone loss in the control parameter  $\lambda \in [0, 1]$ .
- **Calibration and test sizes:** We consider calibration sizes  $n \in \{10, 200\}$  and, for each  $n$ , generate 10,000 (for  $n = 10$ ) or 2,000 (for  $n = 200$ ) independent calibration/test splits. In each split,  $n$  examples are used for calibration and the remaining 10,000 (for  $n = 10$ ) or 5,000 (for  $n = 200$ ) for evaluation.
- **Target risk:** The target spectral risk is fixed at  $\alpha = 0.4$  with confidence level  $1 - \delta = 0.95$  in all synthetic runs.
- **Methods and spectra:** We evaluate CRC, RCPS, HPD, and several BQ-SRC variants: spectral mean (uniform  $\phi$ ), CVaR<sub>0.9</sub>, and mixture spectra such as mix 95/5 (95% mean risk + 5% CVaR<sub>0.9</sub>). Results are summarized in Tables 1–2.
- **Evaluation:** For each method and spectrum, we compute the empirical spectral risk and violation rate over all test examples and trials, and report the mean and 95% confidence intervals across trials. The decision parameter  $\lambda$  is chosen from a uniform grid on  $[0, 1]$  using the binomial LCB rule described above.

## E.4. Heteroskedastic regression protocol

For heteroskedastic regression:

- **Data generation:** Drawing covariates  $X \sim \text{Unif}([0, 4])$  and responses  $Y \sim \mathcal{N}(0, |X|)$ , and then working with  $|Y|$  as the relevant magnitude. Calibration uses  $n = 200$  examples; the remaining examples serve as test points.
- **Prediction intervals and loss:** For each trial we construct symmetric prediction intervals centered at 0 with

half-width  $\lambda$ ; the deployment loss is the miscoverage indicator of the interval. Efficiency is measured by the average interval length  $2\lambda$  on the test set.

- **Target risk and trials:** The target risk is  $\alpha = 0.1$  with confidence level  $1 - \delta = 0.95$ . We run 1,000 random calibration/test splits per method.
- **Methods and spectra:** We compare CRC, RCPS, HPD, and BQ-SRC (primarily the mix 95/5 spectral density) under the same calibration data. The main summary appears in Table 3.
- **Calibration grid:** We discretize the half-width  $\lambda$  over a uniform grid spanning the empirically relevant scale of the response (from a small positive minimum up to a large maximum ensuring near-trivial coverage), and select the smallest  $\lambda$  whose certified spectral risk does not exceed  $\alpha$ .

### E.5. Closed-set ImageNet protocol

For closed-set classification on ImageNet:

- **Dataset and model:** We use the ImageNet validation split with a ResNet-152 classifier as the base model. The classifier is pre-trained on the ImageNet training set using a standard training recipe.
- **Nonconformity scores:** We evaluate three standard scores: LAC, APS, and RAPS [3], following prior work on risk-controlling prediction sets.
- **Calibration sizes and target risks:** Calibration sizes are  $n \in \{256, 1000, 5000\}$ ; target risks  $\alpha \in \{0.1, 0.05, 0.01\}$  with confidence level  $1 - \delta = 0.95$ .
- **Methods:** We include Split-CP APS baselines, CRC, RCPS, and BQ-SRC with several spectral densities (mean, mix 95/5, and other mixtures), along with ablations that swap binomial LCB quantiles for DKW inflation. For each method, we evaluate coverage, mean set size, and class-conditional coverage (CCV) variance at each  $(\alpha, n)$  combination.
- **Evaluation:** For each configuration we form prediction sets using the chosen nonconformity score and calibration rule, then compute empirical coverage and set size over the full validation set. Closed-set tables in Section G report averages across all runs at each  $(\alpha, n)$  and include CCV variance as a fairness-sensitive metric.

### E.6. Zero-shot classification protocol

For zero-shot experiments:

- **Backbones and adaptations:** We consider two CLIP-family encoders, OpenAI CLIP ViT-L/14 and MetaCLIP ViT-H/14, following framework of [38].
- **Datasets:** We adopt the standard CLIP-Conformal zero-shot suites, grouped into: ImageNet and its variants (ImageNet, V2, R, Sketch), shifted/robustness benchmarks (ImageNet-A, SUN397, Aircraft, EuroSAT, Stanford Cars), and long-tail datasets (Food101, Oxford Pets,

Flowers, Caltech-101, DTD, UCF).

- **Calibration protocol:** For each dataset/backbone/adaptation combination, we consider target risks  $\alpha \in \{0.1, 0.05\}$ , confidence level  $1 - \delta = 0.95$ , and calibration fractions in  $\{1\%, 2.5\%, 5\%, 10\%\}$ , using 20 random seeds. APS is used as the nonconformity score for Split-CP baselines and BQ-SRC.
- **Spectral densities and risk multipliers:** BQ-SRC is run with spectral mean, mix 95/05, and  $\text{CVaR}_{0.9}$  densities and with risk multipliers  $\{1.0, 0.75, 0.5\}$  scaling the target risk.
- **Evaluation and aggregation:** For each configuration we compute per-dataset coverage, mean prediction-set size, and tail metrics such as  $\text{CVaR}_{0.95}$  of the miscoverage distribution. The zero-shot tables in this appendix aggregate these metrics by averaging over calibration fractions and seeds, reporting one row per dataset/backbone/adaptation/method combination.

### E.7. Semantic segmentation protocol

For semantic segmentation experiments:

- **Datasets and models:** We evaluate Cityscapes with PSP-Net logits and ADE20K with SegFormer logits. The base models are trained on the standard training splits with widely used configurations; segmentation logits and ground-truth masks are then treated as fixed inputs to calibration.
- **Losses and masks:** We consider two loss types: (i) a binary minimum-coverage loss that enforces per-image coverage constraints, and (ii) a pixel-wise miscoverage loss, following the definitions in [27].
- **Calibration sizes and trials:** For ADE20K we use calibration size  $n = 512$  and 10 randomized calibration/test splits; Cityscapes experiments use calibration size  $n = 256$  with the same number of splits. In each trial, distinct calibration and validation subsets are drawn without replacement from the corresponding validation set.
- **Hyperparameters:** For binary-loss experiments, we sweep minimum coverage ratios (e.g., 0.75 and 0.90 on ADE20K, 0.95 and 0.99 on Cityscapes) and miscoverage targets  $\alpha$  in  $\{0.01, 0.05, 0.10, 0.20\}$  for ADE20K and a similar range (including  $\alpha \in \{0.005, 0.01, 0.05\}$ ) for Cityscapes. Spectral densities include mean, mix 95/5, and  $\text{CVaR}_{0.9}$ .
- **Evaluation:** For each configuration (dataset, loss type, multimask,  $\alpha$ , coverage target, spectrum) we form calibrated multimask predictions and compute empirical risk, coverage, and mean set size per pixel, averaging across images and the 10 trials. ADE20K tables in this appendix report these metrics, while Cityscapes and LoveDA summary statistics are collected in the final segmentation table.

## F. Additional Experimental Results

**Risk–Efficiency Trade-off.** Fig. 2 compares prediction-set size and spectral risk across methods on MS-COCO under the specified parameters, showing that BQ-SRC-LCB significantly outperforms RCPS while closely tracking the target error level.

**Temperature scaling ablation.** Figure 8 compares BQ-SRC with and without temperature scaling [15]. Temperature scaling reduces mean set size by  $\approx 5\text{--}10\%$  while maintaining validity, demonstrating that better-calibrated scores improve efficiency without weakening guarantees.

**Grid size and MC budget robustness.** Figure 5 shows violation rates and set sizes across grid sizes  $\{128, 256, 512\}$  and MC budgets  $\{2,000, 5,000, 10,000\}$ . Violation rates remain below  $\delta = 5\%$  across all configurations when  $\gamma$  is properly adjusted by the union bound ( $\gamma_{\text{per-test}} = \gamma/|\Lambda_{\text{grid}}|$ ), demonstrating robustness to hyperparameter choices.

**Batch multivald BQ-SRC.** Figure 6 compares global BQ-SRC to batch multivald BQ-SRC with 8 bins stratified by prediction entropy. The entropy model drives the empirical violation rate to **0.0%** (vs.  $\delta = 5\%$ ) while adapting thresholds across difficulty bins, at the cost of a modest increase in mean set size (3.86 vs. 3.39). Using confidence-based strata yields slightly smaller sets (3.44–3.45) with 1.4–2.6% violations, still well below the nominal  $\delta$  budget. Importantly,  $\delta$  is *not split* across bins via Bonferroni; instead, validity follows from a finite union over discretized exceedance thresholds coupled with the LCB test, so  $\delta$  remains global [17]. These results show that the multivald extension enforces subgroup guarantees without resorting to Bonferroni splits of  $\delta$ .

**Parameter sweeps.** Figure 7 shows set sizes and violation rates across  $\alpha \in \{0.05, 0.1, 0.2\}$  and  $\delta \in \{0.05, 0.1\}$ . Results demonstrate monotonic behavior: larger  $\alpha$  and  $\delta$  permit smaller sets, while violations remain controlled at or below the nominal  $\delta$  level.

**Tail-shifted synthetic stress test.** We additionally probe a tail-shifted synthetic setting in which the calibration and test distributions differ in the right tail of the loss, following the construction used in our internal diagnostics. Table 7 compares CRC and BQ-SRC (mix 95/5) on this experiment, showing that BQ-SRC drives spectral risk essentially to zero while maintaining strong control of tail events.

### F.1. Batch Multivald Calibration

### F.2. Shift-Aware Calibration

**Proposition F.1** (Weighted vs unweighted violations). *When using importance weights  $w_i$  for covariate shift, the guarantee holds for the weighted risk  $\mathbb{E}_w[\ell(Z; \lambda)] = \sum_i w_i \ell(Z_i; \lambda)$  where  $\sum_i w_i = 1$ . The unweighted violation rate  $\mathbb{P}[\rho_\phi(\hat{\lambda}) > \alpha]$  is not controlled and can exceed  $\delta$ . A worst-case bound: if weights are bounded away from zero ( $w_i \geq w_{\min} > 0$ ) and the unweighted empirical risk is  $R = \frac{1}{n} \sum_i \ell_i$ , then the weighted risk satisfies*

$$R_w = \sum_i w_i \ell_i \geq w_{\min} \sum_i \ell_i = n w_{\min} R,$$

*but this does not provide a useful upper bound on unweighted violations. A simple counterexample: with two groups where group 1 has high loss and weight  $w_1 \approx 1$ , group 2 has low loss and weight  $w_2 \approx 0$ , the weighted risk can be controlled while the unweighted violation rate approaches 1.*

## G. Closed-Set ImageNet Tables

Tables 10–18 summarize every configuration in our closed-set ImageNet study, covering three nonconformity scores (LAC, APS, RAPS), three calibration sizes ( $n \in \{256, 1000, 5000\}$ ), and multiple spectral/ablation variants for each method. For each  $(\alpha, n)$  and method, we report mean coverage, mean prediction-set size, and class-conditional coverage (CCV) variance over repeated trials; these metrics are computed from the full ImageNet validation set under the calibrated prediction sets.

## H. Zero-Shot Tables

**Aggregation protocol.** Tables 19–21 summarize every zero-shot experiment in our study. For each dataset/backbone/adaptation configuration we run Split-CP and BQ-SRC at both target risks ( $\alpha \in \{0.1, 0.05\}$ ), across calibration fractions in  $[1\%, 10\%]$ , and over 20 random seeds. We then aggregate coverage, mean set size, and  $\text{CVaR}_{0.95}$  across  $\alpha$ , calibration fractions, and seeds, reporting one row per dataset/backbone/adaptation/method combination. Each row lists the Split-CP APS baseline plus three BQ-SRC variants (spectral mean, mix95/05, and  $\text{CVaR}_{0.9}$ , all at risk multiplier 1).

**Key trends.** On ImageNet-style robustness suites (Table 19) BQ-SRC drives coverage from roughly 0.93 to 0.996 independent of the spectral choice, while ConfOT primarily benefits CLIP-ViT-L/14 by slashing tail risk (e.g., imagenet-sketch  $\text{CVaR}_{0.95}$ : 0.101  $\rightarrow$  0.004 for the

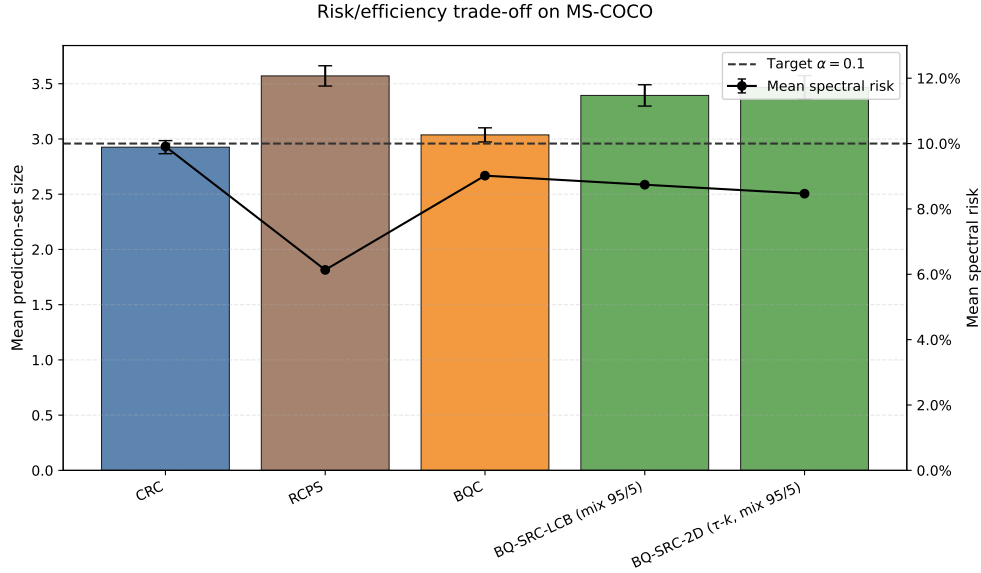

Figure 2. MS-COCO trade-offs at  $\alpha = 0.1$ ,  $1 - \delta = 0.95$ ,  $M = 5000$ ,  $\gamma = 10^{-3}$ . Bars: mean prediction-set size  $\pm$  one standard deviation. Line: mean spectral risk with 95% Wilson confidence intervals; dashed line denotes target  $\alpha = 0.1$ . Legend: BQC.

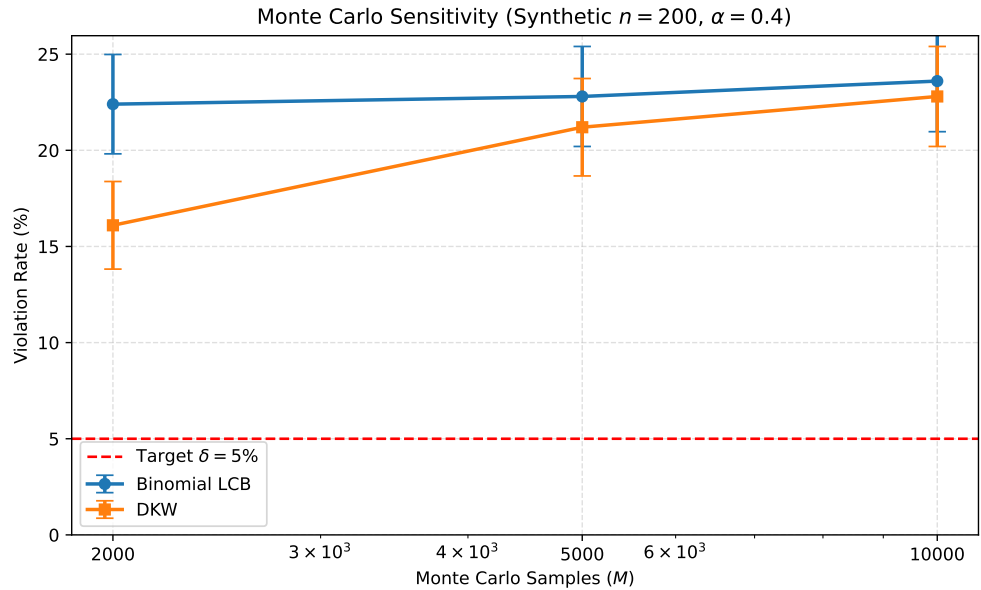

Figure 3. Monte Carlo sensitivity on synthetic  $n = 200$  benchmark ( $\gamma = 10^{-3}$ , grid size  $|\Lambda_{\text{grid}}| = 256$ ,  $\delta = 0.05$ ). Shaded regions denote 95% Wilson confidence intervals [43]; dashed line marks target  $\alpha = 0.4$ . Common random numbers are reused across grid points. The binomial LCB method (using Clopper–Pearson [10] or Wilson [43]) provides tighter control than DKW inflation across all budgets.

CVaR<sub>0.9</sub> spectral). The shifted benchmarks (Table 20) exhibit the largest Conf-OT deltas—ImageNet-A CVaR<sub>0.95</sub> falls from 0.11 to 0.002 even for the smoother spectral mixtures. Long-tail datasets (Table 21) show smaller gains; MetaCLIP without Conf-OT already delivers  $> 0.99$  coverage, so the adaptation can be skipped when efficiency is paramount and spectral mean/mix suffice.

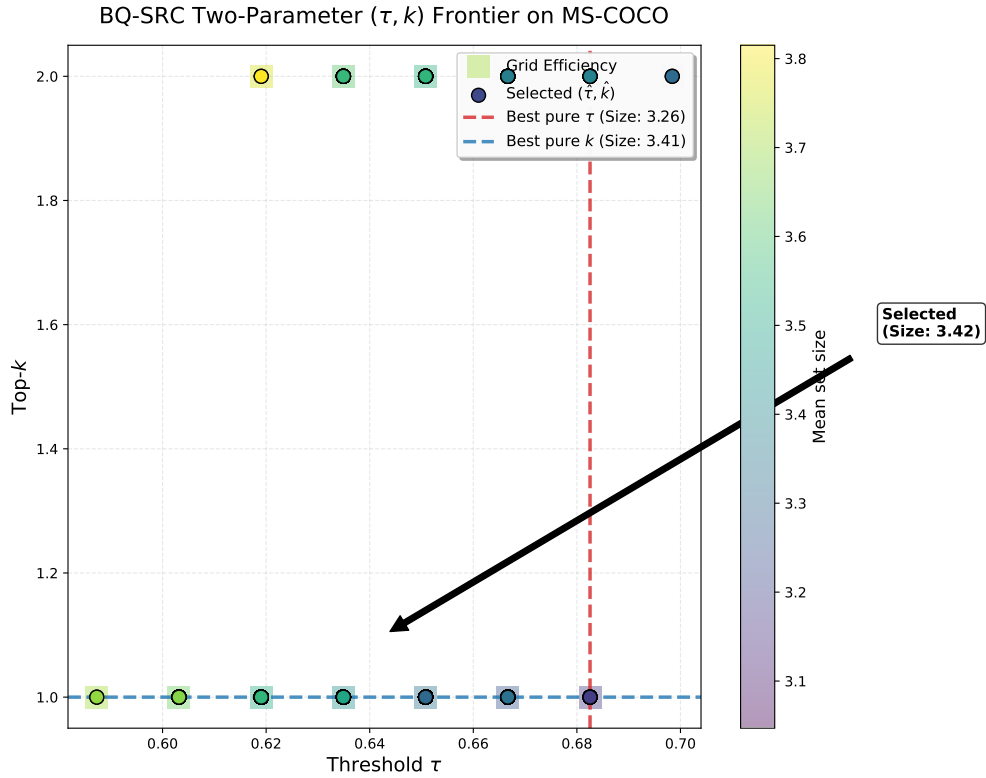

Figure 4. Two-parameter  $(\tau, k)$  frontier on MS-COCO ( $\alpha = 0.1$ ,  $\delta = 0.05$ ,  $M = 5000$ ,  $\gamma = 10^{-3}$ ). The plot visualizes the efficiency landscape (background heatmap) and the selected  $(\hat{\tau}, \hat{k})$  points (foreground scatter) across 1000 trials. Reference lines indicate the best single-parameter optima (pure  $\tau$  and pure  $k$ ), annotated with their respective mean prediction-set sizes. The joint control strategy selects points off the axes, achieving a lower mean set size (annotated centroid) and demonstrating dominance over single-parameter controls. The feasible frontier is an up-set under the partial order  $(\tau_1, k_1) \preceq (\tau_2, k_2)$  iff  $\tau_1 \geq \tau_2$  and  $k_1 \leq k_2$  (Proposition B.3). Grid size:  $|\mathcal{G}| = 256$  pairs. The  $k$ -axis range is motivated by the average COCO label count  $\approx 2.9$  per image [23].

Table 7. Tail-shifted synthetic experiment (5,000 trials, target spectral risk  $\alpha = 0.4$ ). BQ-SRC with a mix 95/5 spectral density achieves near-zero spectral risk and zero empirical violations, while CRC remains slightly conservative in the tail.

| Method                          | Spectral risk        | Violations         | $\lambda$            |
|---------------------------------|----------------------|--------------------|----------------------|
| CRC (Angelopoulos et al., 2024) | 0.011 (0.011, 0.011) | 0.00% (0.00, 0.18) | 0.597 (0.596, 0.597) |
| <b>BQ-SRC (mix 95/5)</b>        | 0.000 (0.000, 0.000) | 0.00% (0.00, 0.07) | 0.861 (0.860, 0.863) |

Table 8. Batch multivald BQ-SRC on MS-COCO (1,000 trials,  $\alpha = 0.1$ ,  $1 - \delta = 0.95$ ). Spectral risk and prediction-set size are reported as mean (95% CI). Violation rates use 95% Wilson confidence intervals [43]. A single global  $\delta$  is used (not Bonferroni-split); groups are stratified by prediction entropy.

| Stratification | Bins | Spectral risk           | Violations         | Prediction-set size  |
|----------------|------|-------------------------|--------------------|----------------------|
| Entropy        | 8    | 0.0830 (0.0827, 0.0833) | 0.00% (0.00, 0.00) | 3.855 (3.846, 3.864) |
| Entropy        | 16   | 0.0842 (0.0839, 0.0845) | 0.00% (0.00, 0.00) | 3.887 (3.877, 3.896) |
| Confidence     | 8    | 0.0879 (0.0876, 0.0883) | 1.40% (0.67, 2.13) | 3.443 (3.437, 3.449) |
| Confidence     | 16   | 0.0891 (0.0888, 0.0895) | 2.60% (1.61, 3.59) | 3.455 (3.448, 3.461) |

Table 9. Shift-aware BQ-SRC on MS-COCO with inverse-positive-count importance weights (1,000 trials,  $\alpha = 0.1$ ,  $1 - \delta = 0.95$ ). Weighted metrics evaluate the guarantee under the deployed importance weights. Violation rates use 95% Wilson confidence intervals [43]. *Note:* Validity here is with respect to the *weighted* target distribution (via importance sampling); unweighted violations are not controlled (see Proposition F.1). This follows the weighted conformal prediction framework [40] for covariate shift. The validity guarantee is with respect to **weighted risk** under the estimated density ratio; unweighted rates can exceed  $\delta$  because guarantees are weighted under covariate shift [40]. In our experiments, inverse-positive-count weights are proportional to the reciprocal of the number of positive labels for each example, normalized so that  $\sum_i w_i = 1$ .

| Metric              | Unweighted              | Weighted                |
|---------------------|-------------------------|-------------------------|
| Spectral risk       | 0.1082 (0.1077, 0.1086) | 0.0876 (0.0872, 0.0880) |
| Violation rate      | 85.60% (83.42, 87.78)   | 2.80% (1.78, 3.82)      |
| Prediction-set size | 2.436 (2.432, 2.440)    | 2.436 (2.432, 2.440)    |

Table 10. Closed-set classification - Adaptive Prediction Sets (APS) [34]: mean coverage across  $\alpha$  and calibration sizes.

| Alpha<br>Calibration size<br>Method | 0.010000 |       |       | 0.050000 |       |       | 0.100000 |       |       |
|-------------------------------------|----------|-------|-------|----------|-------|-------|----------|-------|-------|
|                                     | 256      | 1000  | 5000  | 256      | 1000  | 5000  | 256      | 1000  | 5000  |
| BQ-SRC (Mean)                       | 1.000    | 1.000 | 1.000 | 0.969    | 0.962 | 0.960 | 0.935    | 0.930 | 0.929 |
| BQ-SRC (Mix 95/5)                   | 1.000    | 1.000 | 1.000 | 0.985    | 0.975 | 0.973 | 0.955    | 0.949 | 0.947 |
| BQ-SRC (Mix 95/5) + DKW             | 1.000    | 1.000 | 1.000 | 0.989    | 0.975 | 0.973 | 0.958    | 0.950 | 0.948 |
| CRC                                 | 0.992    | 0.990 | 0.990 | 0.961    | 0.958 | 0.958 | 0.929    | 0.927 | 0.927 |
| RCPS                                | 0.999    | 1.000 | 1.000 | 0.999    | 0.988 | 0.971 | 0.975    | 0.950 | 0.937 |
| Split CP                            | 0.993    | 0.990 | 0.990 | 0.961    | 0.958 | 0.958 | 0.929    | 0.927 | 0.927 |

Table 11. Closed-set classification - APS: mean prediction-set size.

| Alpha<br>Calibration size<br>Method | 0.010000 |          |          | 0.050000 |        |        | 0.100000 |        |        |
|-------------------------------------|----------|----------|----------|----------|--------|--------|----------|--------|--------|
|                                     | 256      | 1000     | 5000     | 256      | 1000   | 5000   | 256      | 1000   | 5000   |
| BQ-SRC (Mean)                       | 990.469  | 999.047  | 1000.000 | 43.668   | 17.622 | 15.994 | 8.022    | 6.881  | 6.601  |
| BQ-SRC (Mix 95/5)                   | 990.469  | 1000.000 | 1000.000 | 318.641  | 31.049 | 26.481 | 14.429   | 11.236 | 10.559 |
| BQ-SRC (Mix 95/5) + DKW             | 990.469  | 1000.000 | 1000.000 | 488.375  | 33.411 | 26.787 | 16.026   | 11.460 | 10.603 |
| CRC                                 | 130.834  | 84.340   | 79.032   | 17.375   | 14.839 | 14.567 | 6.859    | 6.424  | 6.361  |
| RCPS                                | 882.681  | 1000.000 | 1000.000 | 882.681  | 71.157 | 23.739 | 32.984   | 11.463 | 7.985  |
| Split CP                            | 141.312  | 86.500   | 79.563   | 17.489   | 14.812 | 14.559 | 6.855    | 6.411  | 6.359  |

Table 12. Closed-set classification - class-conditional coverage (CCV) variance.

| Alpha<br>Calibration size<br>Method | 0.010000 |       |       | 0.050000 |       |       | 0.100000 |       |       |
|-------------------------------------|----------|-------|-------|----------|-------|-------|----------|-------|-------|
|                                     | 256      | 1000  | 5000  | 256      | 1000  | 5000  | 256      | 1000  | 5000  |
| BQ-SRC (Mean)                       | 0.000    | 0.000 | 0.000 | 0.001    | 0.002 | 0.002 | 0.004    | 0.004 | 0.004 |
| BQ-SRC (Mix 95/5)                   | 0.000    | 0.000 | 0.000 | 0.001    | 0.001 | 0.001 | 0.002    | 0.003 | 0.003 |
| BQ-SRC (Mix 95/5) + DKW             | 0.000    | 0.000 | 0.000 | 0.000    | 0.001 | 0.001 | 0.002    | 0.002 | 0.003 |
| CRC                                 | 0.000    | 0.000 | 0.000 | 0.002    | 0.002 | 0.002 | 0.004    | 0.004 | 0.004 |
| RCPS                                | 0.000    | 0.000 | 0.000 | 0.000    | 0.000 | 0.001 | 0.001    | 0.002 | 0.003 |
| Split CP                            | 0.000    | 0.000 | 0.000 | 0.002    | 0.002 | 0.002 | 0.004    | 0.004 | 0.004 |

Table 13. Closed-set classification - Least Ambiguous Set-Valued Classifier (LAC) [35]: coverage.

| Alpha             | 0.010000 |       |       | 0.050000 |       |       | 0.100000 |       |       |
|-------------------|----------|-------|-------|----------|-------|-------|----------|-------|-------|
| Calibration size  | 256      | 1000  | 5000  | 256      | 1000  | 5000  | 256      | 1000  | 5000  |
| Method            |          |       |       |          |       |       |          |       |       |
| BQ-SRC (Mean)     | 1.000    | 1.000 | 1.000 | 0.980    | 0.961 | 0.958 | 0.913    | 0.904 | 0.902 |
| BQ-SRC (Mix 95/5) | 1.000    | 1.000 | 1.000 | 0.997    | 0.995 | 0.998 | 0.949    | 0.937 | 0.935 |
| Split CP          | 0.992    | 0.990 | 0.990 | 0.953    | 0.950 | 0.950 | 0.903    | 0.900 | 0.900 |

Table 14. Closed-set classification - LAC: prediction-set size.

| Alpha             | 0.010000 |          |          | 0.050000 |         |         | 0.100000 |       |       |
|-------------------|----------|----------|----------|----------|---------|---------|----------|-------|-------|
| Calibration size  | 256      | 1000     | 5000     | 256      | 1000    | 5000    | 256      | 1000  | 5000  |
| Method            |          |          |          |          |         |         |          |       |       |
| BQ-SRC (Mean)     | 1000.000 | 1000.000 | 1000.000 | 540.025  | 98.058  | 4.547   | 2.147    | 1.866 | 1.813 |
| BQ-SRC (Mix 95/5) | 1000.000 | 1000.000 | 1000.000 | 923.362  | 859.696 | 952.237 | 89.247   | 2.894 | 2.712 |
| Split CP          | 63.035   | 28.602   | 25.825   | 4.357    | 3.681   | 3.615   | 1.889    | 1.790 | 1.776 |

Table 15. Closed-set classification - LAC: CCV variance.

| Alpha             | 0.010000 |       |       | 0.050000 |       |       | 0.100000 |       |       |
|-------------------|----------|-------|-------|----------|-------|-------|----------|-------|-------|
| Calibration size  | 256      | 1000  | 5000  | 256      | 1000  | 5000  | 256      | 1000  | 5000  |
| Method            |          |       |       |          |       |       |          |       |       |
| BQ-SRC (Mean)     | 0.000    | 0.000 | 0.000 | 0.001    | 0.002 | 0.002 | 0.006    | 0.007 | 0.007 |
| BQ-SRC (Mix 95/5) | 0.000    | 0.000 | 0.000 | 0.000    | 0.000 | 0.000 | 0.003    | 0.004 | 0.004 |
| Split CP          | 0.000    | 0.000 | 0.000 | 0.003    | 0.003 | 0.003 | 0.007    | 0.007 | 0.007 |

Table 16. Closed-set classification - Regularized APS (RAPS) [3]: coverage.

| Alpha             | 0.010000 |       |       | 0.050000 |       |       | 0.100000 |       |       |
|-------------------|----------|-------|-------|----------|-------|-------|----------|-------|-------|
| Calibration size  | 256      | 1000  | 5000  | 256      | 1000  | 5000  | 256      | 1000  | 5000  |
| Method            |          |       |       |          |       |       |          |       |       |
| BQ-SRC (Mean)     | 0.996    | 0.994 | 0.991 | 0.969    | 0.962 | 0.959 | 0.934    | 0.929 | 0.928 |
| BQ-SRC (Mix 95/5) | 0.996    | 0.996 | 0.994 | 0.982    | 0.975 | 0.976 | 0.954    | 0.948 | 0.946 |
| Split CP          | 0.992    | 0.990 | 0.990 | 0.958    | 0.955 | 0.955 | 0.927    | 0.925 | 0.925 |

Table 17. Closed-set classification - RAPS: prediction-set size.

| Alpha             | 0.010000 |         |        | 0.050000 |       |       | 0.100000 |       |       |
|-------------------|----------|---------|--------|----------|-------|-------|----------|-------|-------|
| Calibration size  | 256      | 1000    | 5000   | 256      | 1000  | 5000  | 256      | 1000  | 5000  |
| Method            |          |         |        |          |       |       |          |       |       |
| BQ-SRC (Mean)     | 177.696  | 52.229  | 31.141 | 9.065    | 7.591 | 7.283 | 5.091    | 4.704 | 4.603 |
| BQ-SRC (Mix 95/5) | 177.696  | 102.530 | 50.651 | 14.717   | 9.763 | 9.690 | 6.871    | 6.154 | 5.991 |
| Split CP          | 69.366   | 29.256  | 25.176 | 7.249    | 6.855 | 6.837 | 4.587    | 4.442 | 4.432 |

Table 18. Closed-set classification - RAPS: CCV variance.

| Alpha             | 0.010000 |       |       | 0.050000 |       |       | 0.100000 |       |       |
|-------------------|----------|-------|-------|----------|-------|-------|----------|-------|-------|
| Calibration size  | 256      | 1000  | 5000  | 256      | 1000  | 5000  | 256      | 1000  | 5000  |
| Method            |          |       |       |          |       |       |          |       |       |
| BQ-SRC (Mean)     | 0.000    | 0.000 | 0.000 | 0.001    | 0.002 | 0.002 | 0.004    | 0.004 | 0.004 |
| BQ-SRC (Mix 95/5) | 0.000    | 0.000 | 0.000 | 0.001    | 0.001 | 0.001 | 0.002    | 0.003 | 0.003 |
| Split CP          | 0.000    | 0.000 | 0.000 | 0.002    | 0.002 | 0.002 | 0.004    | 0.004 | 0.005 |

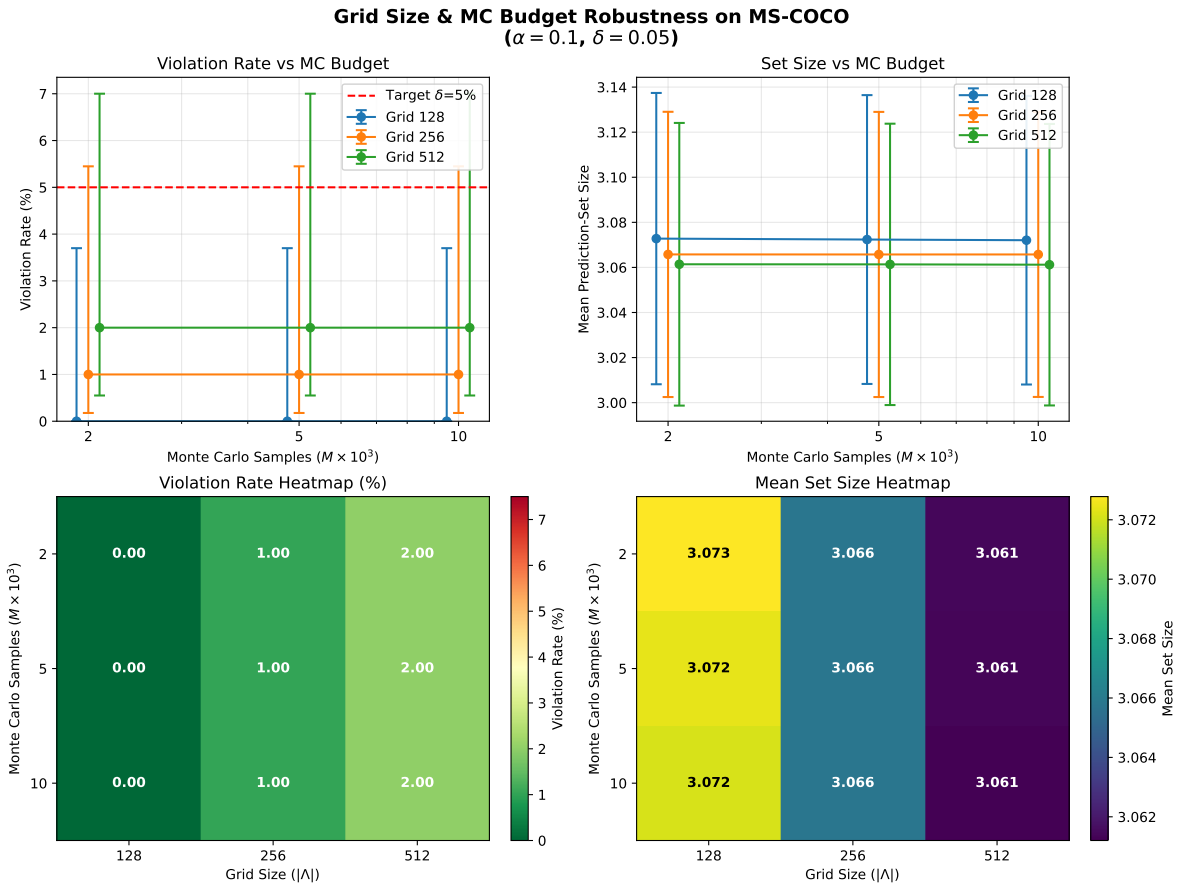

Figure 5. Grid size and Monte Carlo budget robustness on MS-COCO ( $\alpha = 0.1, \delta = 0.05, \gamma = 10^{-3}$ ). Top: violation rates and set sizes vs MC budget for different grid sizes. Bottom: heatmaps showing stability across configurations. Violation rates remain below  $\delta = 5\%$  when  $\gamma$  is adjusted by union bound ( $\gamma_{\text{per-test}} = \gamma/|\Lambda_{\text{grid}}|$ ).

Table 19. Zero-shot accuracy and tail risk on ImageNet, V2, -R, and Sketch averaged over all calibration fractions and  $\alpha \in \{0.1, 0.05\}$ .

| Dataset         | Backbone          | Adapt  | Split CP (APS) |      | BQ mean |      | BQ mix95/05 |      | BQ CVaR <sub>0.9</sub> |       |
|-----------------|-------------------|--------|----------------|------|---------|------|-------------|------|------------------------|-------|
|                 |                   |        | Cov            | Size | Cv      | Size | Cov         | Size | Cov                    | Size  |
| imagenet        | CLIP-ViT-L/14     | none   | 0.928          | 4.8  | 0.960   | 6.2  | 0.894       | 8.8  | 0.958                  | 101.0 |
| imagenet        | CLIP-ViT-L/14     | confot | 0.928          | 5.3  | 0.053   | 6.7  | 0.040       | 10.3 | 0.029                  | 125.8 |
| imagenet        | MetaCLIP-ViT-H/14 | none   | 0.925          | 2.9  | 0.071   | 4.0  | 0.052       | 5.6  | 0.038                  | 74.6  |
| imagenet        | MetaCLIP-ViT-H/14 | confot | 0.926          | 3.1  | 0.056   | 4.4  | 0.034       | 6.1  | 0.022                  | 110.5 |
| imagenetv2      | CLIP-ViT-L/14     | none   | 0.924          | 5.6  | 0.964   | 7.1  | 0.928       | 10.9 | 0.816                  | 200.9 |
| imagenetv2      | CLIP-ViT-L/14     | confot | 0.921          | 6.2  | 0.065   | 7.8  | 0.053       | 12.5 | 0.039                  | 241.5 |
| imagenetv2      | MetaCLIP-ViT-H/14 | none   | 0.925          | 3.5  | 0.080   | 4.6  | 0.063       | 6.8  | 0.047                  | 131.1 |
| imagenetv2      | MetaCLIP-ViT-H/14 | confot | 0.922          | 4.1  | 0.078   | 5.6  | 0.056       | 8.3  | 0.039                  | 156.9 |
| imagenet-r      | CLIP-ViT-L/14     | none   | 0.931          | 1.8  | 0.956   | 2.3  | 0.917       | 3.6  | 0.788                  | 55.3  |
| imagenet-r      | CLIP-ViT-L/14     | confot | 0.927          | 2.0  | 0.078   | 2.5  | 0.069       | 4.3  | 0.051                  | 61.8  |
| imagenet-r      | MetaCLIP-ViT-H/14 | none   | 0.951          | 1.2  | 0.038   | 1.4  | 0.034       | 1.9  | 0.030                  | 36.2  |
| imagenet-r      | MetaCLIP-ViT-H/14 | confot | 0.949          | 1.2  | 0.040   | 1.4  | 0.036       | 2.0  | 0.032                  | 41.9  |
| imagenet-sketch | CLIP-ViT-L/14     | none   | 0.923          | 24.6 | 0.982   | 28.2 | 0.969       | 47.0 | 0.839                  | 623.2 |
| imagenet-sketch | CLIP-ViT-L/14     | confot | 0.921          | 19.1 | 0.064   | 22.0 | 0.058       | 38.9 | 0.041                  | 551.1 |
| imagenet-sketch | MetaCLIP-ViT-H/14 | none   | 0.924          | 8.8  | 0.074   | 11.0 | 0.061       | 19.9 | 0.047                  | 522.7 |
| imagenet-sketch | MetaCLIP-ViT-H/14 | confot | 0.923          | 8.5  | 0.074   | 11.0 | 0.060       | 18.8 | 0.048                  | 459.8 |

Table 20. Zero-shot robustness on ImageNet-A, SUN397, Aircraft, EuroSAT, and Stanford Cars.

| Dataset       | Backbone          | Adapt  | Split CP (APS) |       | BQ mean |       | BQ mix95/05 |       | BQ CVaR <sub>0.9</sub> |       |       |       |       |       |
|---------------|-------------------|--------|----------------|-------|---------|-------|-------------|-------|------------------------|-------|-------|-------|-------|-------|
|               |                   |        | Cov            | Size  | Cov     | Size  | Cov         | Size  | Cov                    | Size  |       |       |       |       |
| imagenet-a    | CLIP-ViT-L/14     | none   | 0.935          | 10.1  | 0.889   | 0.945 | 13.5        | 0.823 | 0.965                  | 23.2  | 0.644 | 0.997 | 115.9 | 0.054 |
| imagenet-a    | CLIP-ViT-L/14     | confot | 0.923          | 11.8  | 0.103   | 0.934 | 15.4        | 0.087 | 0.956                  | 25.3  | 0.052 | 0.996 | 124.3 | 0.002 |
| imagenet-a    | MetaCLIP-ViT-H/14 | none   | 0.933          | 8.1   | 0.074   | 0.942 | 11.0        | 0.061 | 0.962                  | 19.3  | 0.034 | 0.997 | 122.2 | 0.004 |
| imagenet-a    | MetaCLIP-ViT-H/14 | confot | 0.920          | 9.6   | 0.058   | 0.931 | 12.7        | 0.046 | 0.952                  | 22.8  | 0.026 | 0.996 | 136.8 | 0.002 |
| sun397        | CLIP-ViT-L/14     | none   | 0.923          | 5.1   | 0.973   | 0.931 | 5.6         | 0.946 | 0.953                  | 8.1   | 0.815 | 0.997 | 101.5 | 0.069 |
| sun397        | CLIP-ViT-L/14     | confot | 0.925          | 4.4   | 0.063   | 0.932 | 4.9         | 0.056 | 0.953                  | 7.1   | 0.039 | 0.996 | 82.7  | 0.003 |
| sun397        | MetaCLIP-ViT-H/14 | none   | 0.926          | 3.1   | 0.057   | 0.935 | 3.5         | 0.047 | 0.955                  | 4.8   | 0.027 | 0.997 | 61.8  | 0.001 |
| sun397        | MetaCLIP-ViT-H/14 | confot | 0.926          | 3.0   | 0.062   | 0.935 | 3.4         | 0.052 | 0.956                  | 4.7   | 0.029 | 0.996 | 58.4  | 0.002 |
| aircraft      | CLIP-ViT-L/14     | none   | 0.926          | 10.9  | 0.904   | 0.953 | 15.6        | 0.682 | 0.973                  | 20.7  | 0.487 | 0.991 | 32.8  | 0.173 |
| aircraft      | CLIP-ViT-L/14     | confot | 0.927          | 10.7  | 0.107   | 0.951 | 14.8        | 0.080 | 0.971                  | 20.4  | 0.058 | 0.990 | 33.2  | 0.027 |
| aircraft      | MetaCLIP-ViT-H/14 | none   | 0.924          | 5.4   | 0.240   | 0.951 | 8.3         | 0.186 | 0.972                  | 11.7  | 0.133 | 0.991 | 20.5  | 0.054 |
| aircraft      | MetaCLIP-ViT-H/14 | confot | 0.925          | 4.4   | 0.084   | 0.949 | 6.4         | 0.067 | 0.968                  | 9.4   | 0.051 | 0.987 | 17.4  | 0.025 |
| eurosat       | CLIP-ViT-L/14     | none   | 0.932          | 3.8   | 0.900   | 0.946 | 4.4         | 0.772 | 0.965                  | 5.1   | 0.626 | 0.996 | 8.4   | 0.085 |
| eurosat       | CLIP-ViT-L/14     | confot | 0.931          | 3.4   | 0.003   | 0.945 | 4.0         | 0.002 | 0.964                  | 4.6   | 0.002 | 0.995 | 7.4   | 0.000 |
| eurosat       | MetaCLIP-ViT-H/14 | none   | 0.928          | 6.0   | 0.001   | 0.942 | 6.7         | 0.001 | 0.962                  | 7.6   | 0.000 | 0.994 | 9.6   | 0.000 |
| eurosat       | MetaCLIP-ViT-H/14 | confot | 0.927          | 3.3   | 0.000   | 0.941 | 3.8         | 0.000 | 0.960                  | 4.3   | 0.000 | 0.994 | 7.3   | 0.000 |
| stanford_cars | CLIP-ViT-L/14     | none   | 0.930          | 181.9 | 0.947   | 0.939 | 183.7       | 0.865 | 0.960                  | 188.0 | 0.726 | 0.996 | 195.2 | 0.076 |
| stanford_cars | CLIP-ViT-L/14     | confot | 0.929          | 181.8 | 0.000   | 0.939 | 183.8       | 0.000 | 0.960                  | 187.9 | 0.000 | 0.996 | 195.2 | 0.000 |
| stanford_cars | MetaCLIP-ViT-H/14 | none   | 0.929          | 182.4 | 0.000   | 0.939 | 184.4       | 0.000 | 0.961                  | 188.6 | 0.000 | 0.998 | 195.6 | 0.000 |
| stanford_cars | MetaCLIP-ViT-H/14 | confot | 0.930          | 182.2 | 0.000   | 0.939 | 184.1       | 0.000 | 0.961                  | 188.5 | 0.000 | 0.998 | 195.6 | 0.000 |

Table 21. Zero-shot generalization on Food101, Pets, Flowers, Caltech101, DTD, and UCF.

| Dataset     | Backbone          | Adapt  | Split CP (APS) |      | BQ mean |       | BQ mix95/05 |       | BQ CVaR <sub>0.95</sub> |      | BQ CVaR <sub>0.9</sub> |       |      |       |
|-------------|-------------------|--------|----------------|------|---------|-------|-------------|-------|-------------------------|------|------------------------|-------|------|-------|
|             |                   |        | Cov            | Size | CVaR    | Cov   | Size        | CVaR  | Cov                     | Size | CVaR                   | Cov   | Size | CVaR  |
| food101     | CLIP-ViT-L/14     | none   | 0.940          | 1.3  | 0.079   | 0.947 | 1.4         | 0.070 | 0.955                   | 1.7  | 0.060                  | 0.995 | 19.2 | 0.006 |
| food101     | CLIP-ViT-L/14     | confot | 0.937          | 1.4  | 0.078   | 0.943 | 1.6         | 0.071 | 0.954                   | 2.1  | 0.059                  | 0.995 | 23.4 | 0.006 |
| food101     | MetaCLIP-ViT-H/14 | none   | 0.946          | 1.2  | 0.065   | 0.952 | 1.3         | 0.059 | 0.960                   | 1.6  | 0.051                  | 0.995 | 20.1 | 0.008 |
| food101     | MetaCLIP-ViT-H/14 | confot | 0.942          | 1.2  | 0.079   | 0.949 | 1.4         | 0.070 | 0.957                   | 1.7  | 0.061                  | 0.995 | 22.5 | 0.010 |
| oxford_pets | CLIP-ViT-L/14     | none   | 0.962          | 1.3  | 0.007   | 0.970 | 1.6         | 0.005 | 0.976                   | 1.7  | 0.004                  | 0.990 | 3.4  | 0.001 |
| oxford_pets | CLIP-ViT-L/14     | confot | 0.959          | 1.3  | 0.007   | 0.967 | 1.8         | 0.005 | 0.973                   | 2.1  | 0.003                  | 0.989 | 5.3  | 0.001 |
| oxford_pets | MetaCLIP-ViT-H/14 | none   | 0.974          | 1.2  | 0.002   | 0.977 | 1.4         | 0.002 | 0.981                   | 1.5  | 0.001                  | 0.992 | 2.7  | 0.000 |
| oxford_pets | MetaCLIP-ViT-H/14 | confot | 0.973          | 1.2  | 0.009   | 0.977 | 1.4         | 0.007 | 0.980                   | 1.5  | 0.005                  | 0.991 | 2.9  | 0.002 |
| flowers     | CLIP-ViT-L/14     | none   | 0.929          | 6.1  | 0.081   | 0.951 | 11.5        | 0.043 | 0.975                   | 21.3 | 0.022                  | 0.993 | 37.0 | 0.007 |
| flowers     | CLIP-ViT-L/14     | confot | 0.928          | 3.7  | 0.181   | 0.950 | 6.1         | 0.132 | 0.975                   | 12.7 | 0.067                  | 0.994 | 23.3 | 0.023 |
| flowers     | MetaCLIP-ViT-H/14 | none   | 0.927          | 2.9  | 0.078   | 0.949 | 7.8         | 0.048 | 0.973                   | 17.7 | 0.012                  | 0.995 | 35.8 | 0.002 |
| flowers     | MetaCLIP-ViT-H/14 | confot | 0.932          | 1.7  | 0.117   | 0.952 | 3.5         | 0.081 | 0.974                   | 12.9 | 0.044                  | 0.995 | 30.0 | 0.004 |
| caltech     | CLIP-ViT-L/14     | none   | 0.968          | 1.1  | 0.034   | 0.973 | 1.3         | 0.029 | 0.981                   | 2.0  | 0.020                  | 0.994 | 3.7  | 0.006 |
| caltech     | CLIP-ViT-L/14     | confot | 0.971          | 1.1  | 0.036   | 0.976 | 1.2         | 0.032 | 0.982                   | 2.1  | 0.023                  | 0.995 | 5.5  | 0.004 |
| caltech     | MetaCLIP-ViT-H/14 | none   | 0.987          | 1.0  | 0.014   | 0.989 | 1.1         | 0.013 | 0.991                   | 1.4  | 0.009                  | 0.996 | 2.3  | 0.003 |
| caltech     | MetaCLIP-ViT-H/14 | confot | 0.986          | 1.0  | 0.033   | 0.987 | 1.1         | 0.031 | 0.990                   | 1.4  | 0.026                  | 0.995 | 2.6  | 0.011 |
| dtd         | CLIP-ViT-L/14     | none   | 0.939          | 14.8 | 0.005   | 0.964 | 21.1        | 0.001 | 0.979                   | 25.6 | 0.000                  | 0.984 | 28.6 | 0.000 |
| dtd         | CLIP-ViT-L/14     | confot | 0.937          | 12.5 | 0.021   | 0.965 | 18.7        | 0.011 | 0.978                   | 22.3 | 0.006                  | 0.984 | 25.7 | 0.005 |
| dtd         | MetaCLIP-ViT-H/14 | none   | 0.935          | 5.2  | 0.009   | 0.965 | 10.7        | 0.002 | 0.978                   | 15.8 | 0.001                  | 0.984 | 19.3 | 0.000 |
| dtd         | MetaCLIP-ViT-H/14 | confot | 0.937          | 4.5  | 0.044   | 0.967 | 7.8         | 0.021 | 0.980                   | 10.6 | 0.010                  | 0.986 | 13.1 | 0.006 |
| ucf         | CLIP-ViT-L/14     | none   | 0.934          | 4.8  | 0.031   | 0.954 | 8.5         | 0.021 | 0.973                   | 13.5 | 0.012                  | 0.994 | 28.1 | 0.001 |
| ucf         | CLIP-ViT-L/14     | confot | 0.932          | 5.0  | 0.093   | 0.952 | 9.1         | 0.070 | 0.973                   | 15.7 | 0.042                  | 0.994 | 34.7 | 0.010 |
| ucf         | MetaCLIP-ViT-H/14 | none   | 0.925          | 2.3  | 0.064   | 0.947 | 5.1         | 0.046 | 0.969                   | 9.6  | 0.025                  | 0.993 | 24.4 | 0.004 |
| ucf         | MetaCLIP-ViT-H/14 | confot | 0.930          | 2.3  | 0.094   | 0.952 | 5.7         | 0.072 | 0.972                   | 12.6 | 0.047                  | 0.993 | 37.4 | 0.009 |

**Batch Multivald BQ-SRC Variants (8 bins by entropy)**  
 $(\alpha = 0.1, \delta = 0.05)$

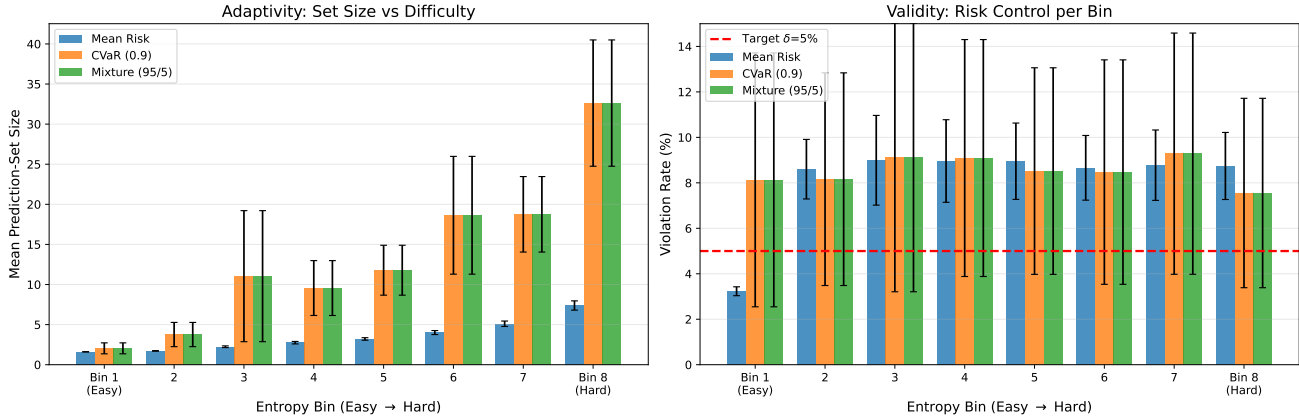

Figure 6. Batch multivald [17] BQ-SRC variants on MS-COCO ( $\alpha = 0.1, \delta = 0.05$ ). We compare Mean Risk (BQC, blue),  $\text{CVaR}_{0.9}$  (orange), and Mixture 95/5 (green) across 8 entropy bins (Easy  $\rightarrow$  Hard). **Left:** Mean prediction-set size. All methods adapt by increasing set sizes for harder examples, but CVaR and Mixture variants require significantly larger sets in the hardest bins to satisfy their stricter tail-risk constraints. **Right:** Violation rate. All methods maintain valid risk control (violation rates consistent with  $\delta = 5\%$ ) across all difficulty bins, demonstrating the robustness of the multivald calibration. The large error bars reflect the smaller sample sizes within each bin.

**BQ-SRC  $\alpha$  and  $\delta$  Parameter Sweeps on MS-COCO**

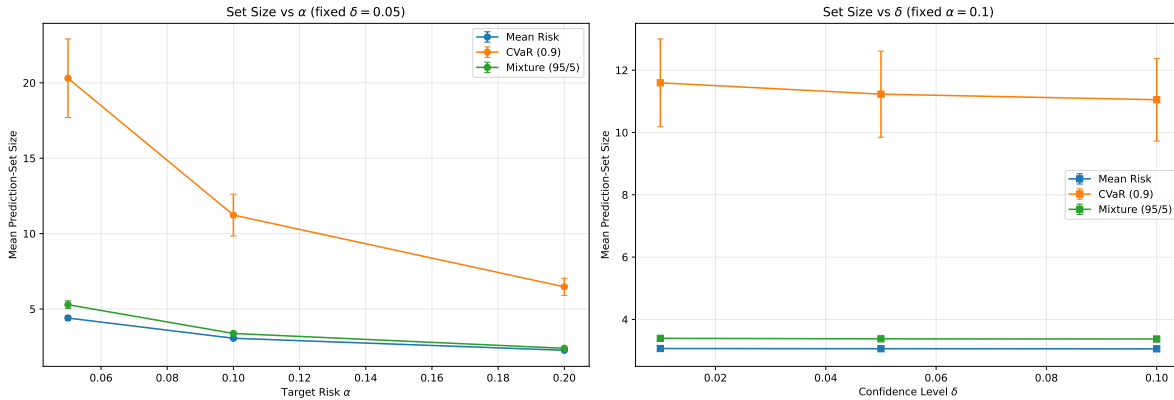

Figure 7. Parameter sweeps for  $\alpha \in \{0.05, 0.1, 0.2\}$  and  $\delta \in \{0.05, 0.1\}$  on MS-COCO ( $M = 5000, \gamma = 10^{-3}$ ). Top: set sizes vs parameters. Bottom: violation rate and set size heatmaps showing monotonic behavior and validity control.

Table 22. ADE20K binary loss with  $\alpha = 0.10$  and minimum coverage 0.75. Mean BQ-SRC closely matches CRC (empirical risk  $\approx 0.095$ , set size  $\approx 1.5$ ), the mix 95/5 spectrum boosts coverage by  $\sim 5$  pp at the cost of much larger sets, and CVaR remains fully conservative.

| Method | Spectral | Multimask | Empirical risk      | Coverage            | Mean set size       |
|--------|----------|-----------|---------------------|---------------------|---------------------|
| bqsrc  | cvar     | APS       | $0.0000 \pm 0.0000$ | $0.9998 \pm 0.0000$ | $134.062 \pm 0.031$ |
| bqsrc  | mean     | APS       | $0.0940 \pm 0.0081$ | $0.9119 \pm 0.0054$ | $1.577 \pm 0.079$   |
| bqsrc  | mixture  | APS       | $0.0415 \pm 0.0179$ | $0.9587 \pm 0.0178$ | $41.948 \pm 39.381$ |
| crc    | mean     | APS       | $0.0985 \pm 0.0071$ | $0.9074 \pm 0.0048$ | $1.507 \pm 0.057$   |
| bqsrc  | cvar     | LAC       | $0.0000 \pm 0.0000$ | $1.0000 \pm 0.0000$ | $150.000 \pm 0.000$ |
| bqsrc  | mean     | LAC       | $0.0919 \pm 0.0088$ | $0.9128 \pm 0.0060$ | $1.510 \pm 0.074$   |
| bqsrc  | mixture  | LAC       | $0.0379 \pm 0.0205$ | $0.9604 \pm 0.0212$ | $61.141 \pm 47.401$ |
| crc    | mean     | LAC       | $0.0977 \pm 0.0072$ | $0.9085 \pm 0.0047$ | $1.454 \pm 0.047$   |

Table 23. ADE20K miscoverage loss with  $\alpha = 0.20$ . The relaxed target lets mean-risk methods achieve the goal with  $\approx 1$  class per pixel; mix spectra offer marginal coverage gains, whereas CVaR stays maximally conservative.

| Method | Spectral | Multimask | Empirical risk      | Coverage            | Mean set size       |
|--------|----------|-----------|---------------------|---------------------|---------------------|
| bqsrc  | cvar     | APS       | $0.0002 \pm 0.0000$ | $0.9998 \pm 0.0000$ | $134.062 \pm 0.031$ |
| bqsrc  | mean     | APS       | $0.1803 \pm 0.0010$ | $0.8197 \pm 0.0010$ | $1.000 \pm 0.000$   |
| bqsrc  | mixture  | APS       | $0.1777 \pm 0.0030$ | $0.8223 \pm 0.0030$ | $1.010 \pm 0.008$   |
| crc    | mean     | APS       | $0.1803 \pm 0.0010$ | $0.8197 \pm 0.0010$ | $1.000 \pm 0.000$   |
| bqsrc  | cvar     | LAC       | $0.0000 \pm 0.0000$ | $1.0000 \pm 0.0000$ | $150.000 \pm 0.000$ |
| bqsrc  | mean     | LAC       | $0.1803 \pm 0.0010$ | $0.8197 \pm 0.0010$ | $1.000 \pm 0.000$   |
| bqsrc  | mixture  | LAC       | $0.1776 \pm 0.0030$ | $0.8224 \pm 0.0030$ | $1.006 \pm 0.005$   |
| crc    | mean     | LAC       | $0.1803 \pm 0.0010$ | $0.8197 \pm 0.0010$ | $1.000 \pm 0.000$   |

Table 24. Cityscapes binary loss — aggregate view across all  $\alpha$  and coverage targets. Spectral risk (mean / CVaR<sub>0.9</sub> / mix 95/5) is shown for each experiment.

| $\alpha$ | $\tau$ | Method        | Spectral Risk | Empirical Risk | AR             |
|----------|--------|---------------|---------------|----------------|----------------|
| 0.10     | 0.99   | CRC           | 0.082         | 0.082 (0.020)  | 1.294 (0.017)  |
|          |        | BQ-SRC (Mean) | 0.080         | 0.080 (0.019)  | 1.297 (0.014)  |
|          |        | BQ-SRC (CVaR) | 0.000         | 0.000 (0.000)  | 19.000 (0.000) |
|          |        | BQ-SRC (Mix)  | 0.064         | 0.044 (0.016)  | 1.456 (0.054)  |
| 0.10     | 0.95   | CRC           | 0.102         | 0.102 (0.013)  | 1.035 (0.003)  |
|          |        | BQ-SRC (Mean) | 0.093         | 0.093 (0.015)  | 1.037 (0.003)  |
|          |        | BQ-SRC (CVaR) | 0.016         | 0.002 (0.003)  | 6.805 (8.418)  |
|          |        | BQ-SRC (Mix)  | 0.086         | 0.059 (0.011)  | 1.050 (0.005)  |
| 0.10     | 0.90   | CRC           | 0.036         | 0.036 (0.005)  | 1.000 (0.000)  |
|          |        | BQ-SRC (Mean) | 0.036         | 0.036 (0.005)  | 1.000 (0.000)  |
|          |        | BQ-SRC (CVaR) | 0.016         | 0.002 (0.004)  | 1.402 (0.167)  |
|          |        | BQ-SRC (Mix)  | 0.052         | 0.036 (0.005)  | 1.000 (0.000)  |
| 0.10     | 0.75   | CRC           | 0.003         | 0.003 (0.003)  | 1.000 (0.000)  |
|          |        | BQ-SRC (Mean) | 0.003         | 0.003 (0.003)  | 1.000 (0.000)  |
|          |        | BQ-SRC (CVaR) | 0.016         | 0.002 (0.003)  | 1.040 (0.043)  |
|          |        | BQ-SRC (Mix)  | 0.005         | 0.003 (0.003)  | 1.000 (0.000)  |
| 0.01     | 0.99   | CRC           | 0.000         | 0.000 (0.000)  | 19.000 (0.000) |
|          |        | BQ-SRC (Mean) | 0.000         | 0.000 (0.000)  | 19.000 (0.000) |
|          |        | BQ-SRC (CVaR) | 0.000         | 0.000 (0.000)  | 19.000 (0.000) |
|          |        | BQ-SRC (Mix)  | 0.000         | 0.000 (0.000)  | 19.000 (0.000) |
| 0.01     | 0.95   | CRC           | 0.007         | 0.007 (0.007)  | 1.272 (0.162)  |
|          |        | BQ-SRC (Mean) | 0.002         | 0.002 (0.003)  | 6.805 (8.418)  |
|          |        | BQ-SRC (CVaR) | 0.016         | 0.002 (0.003)  | 6.805 (8.418)  |
|          |        | BQ-SRC (Mix)  | 0.002         | 0.002 (0.003)  | 6.805 (8.418)  |
| 0.01     | 0.90   | CRC           | 0.007         | 0.007 (0.005)  | 1.130 (0.127)  |
|          |        | BQ-SRC (Mean) | 0.002         | 0.002 (0.004)  | 1.402 (0.167)  |
|          |        | BQ-SRC (CVaR) | 0.016         | 0.002 (0.004)  | 1.402 (0.167)  |
|          |        | BQ-SRC (Mix)  | 0.002         | 0.002 (0.004)  | 1.402 (0.167)  |
| 0.01     | 0.75   | CRC           | 0.003         | 0.003 (0.003)  | 1.007 (0.021)  |
|          |        | BQ-SRC (Mean) | 0.002         | 0.002 (0.003)  | 1.040 (0.043)  |
|          |        | BQ-SRC (CVaR) | 0.016         | 0.002 (0.003)  | 1.040 (0.043)  |
|          |        | BQ-SRC (Mix)  | 0.002         | 0.002 (0.003)  | 1.040 (0.043)  |

Table 25. Cityscapes miscoverage loss — aggregate view across all  $\alpha$  values. Spectral risk reflects the specified spectrum per method, recomputed from per-image losses.

| $\alpha$ | Method        | Spectral Risk | Empirical Risk | AR             |
|----------|---------------|---------------|----------------|----------------|
| 0.20     | CRC           | 0.041         | 0.041 (0.001)  | 1.000 (0.000)  |
|          | BQ-SRC (Mean) | 0.041         | 0.041 (0.001)  | 1.000 (0.000)  |
|          | BQ-SRC (CVaR) | 0.106         | 0.041 (0.001)  | 1.000 (0.000)  |
|          | BQ-SRC (Mix)  | 0.044         | 0.041 (0.001)  | 1.000 (0.000)  |
| 0.10     | CRC           | 0.041         | 0.041 (0.001)  | 1.000 (0.000)  |
|          | BQ-SRC (Mean) | 0.041         | 0.041 (0.001)  | 1.000 (0.000)  |
|          | BQ-SRC (CVaR) | 0.089         | 0.032 (0.007)  | 1.024 (0.021)  |
|          | BQ-SRC (Mix)  | 0.044         | 0.041 (0.001)  | 1.000 (0.000)  |
| 0.05     | CRC           | 0.041         | 0.041 (0.001)  | 1.000 (0.000)  |
|          | BQ-SRC (Mean) | 0.041         | 0.041 (0.001)  | 1.000 (0.000)  |
|          | BQ-SRC (CVaR) | 0.040         | 0.011 (0.004)  | 1.152 (0.057)  |
|          | BQ-SRC (Mix)  | 0.044         | 0.041 (0.001)  | 1.000 (0.000)  |
| 0.01     | CRC           | 0.006         | 0.006 (0.001)  | 1.232 (0.014)  |
|          | BQ-SRC (Mean) | 0.009         | 0.009 (0.001)  | 1.170 (0.018)  |
|          | BQ-SRC (CVaR) | 0.002         | 0.000 (0.001)  | 15.545 (7.284) |
|          | BQ-SRC (Mix)  | 0.008         | 0.007 (0.001)  | 1.207 (0.032)  |
| 0.005    | CRC           | 0.000         | 0.000 (0.000)  | 19.000 (0.000) |
|          | BQ-SRC (Mean) | 0.004         | 0.004 (0.001)  | 1.345 (0.049)  |
|          | BQ-SRC (CVaR) | 0.000         | 0.000 (0.000)  | 19.000 (0.000) |
|          | BQ-SRC (Mix)  | 0.004         | 0.003 (0.001)  | 1.447 (0.072)  |

Table 26. Cityscapes semantic segmentation results (10 trials)

| Setup                              | Spectral risk           | Violations              | Prediction-set size     |
|------------------------------------|-------------------------|-------------------------|-------------------------|
| CRC $\alpha = 0.01, \gamma = 0.95$ | 0.0157 (0.0085, 0.0229) | 0.00% (0.00, 30.85)     | 1.2549 (1.1617, 1.3481) |
| CRC $\alpha = 0.01, \gamma = 0.99$ | 0.0162 (0.0039, 0.0286) | 0.00% (0.00, 30.85)     | 2.2912 (2.0898, 2.4926) |
| CRC $\alpha = 0.10, \gamma = 0.95$ | 0.1416 (0.1265, 0.1566) | 100.00% (69.15, 100.00) | 1.0351 (1.0330, 1.0373) |
| CRC $\alpha = 0.10, \gamma = 0.99$ | 0.1481 (0.1341, 0.1622) | 90.00% (55.50, 99.75)   | 1.2708 (1.2638, 1.2779) |

Table 27. LoveDA semantic segmentation results (10 trials)

| Setup                              | Spectral risk           | Violations              | Prediction-set size     |
|------------------------------------|-------------------------|-------------------------|-------------------------|
| CRC $\alpha = 0.01, \gamma = 0.50$ | 0.0144 (0.0060, 0.0227) | 0.00% (0.00, 30.85)     | 3.6680 (3.4363, 3.8996) |
| CRC $\alpha = 0.01, \gamma = 0.75$ | 0.0125 (0.0065, 0.0185) | 0.00% (0.00, 30.85)     | 4.9822 (4.7953, 5.1691) |
| CRC $\alpha = 0.10, \gamma = 0.50$ | 0.1400 (0.1278, 0.1522) | 100.00% (69.15, 100.00) | 1.1503 (1.0906, 1.2100) |
| CRC $\alpha = 0.10, \gamma = 0.75$ | 0.1471 (0.1367, 0.1574) | 100.00% (69.15, 100.00) | 2.5448 (2.4162, 2.6734) |

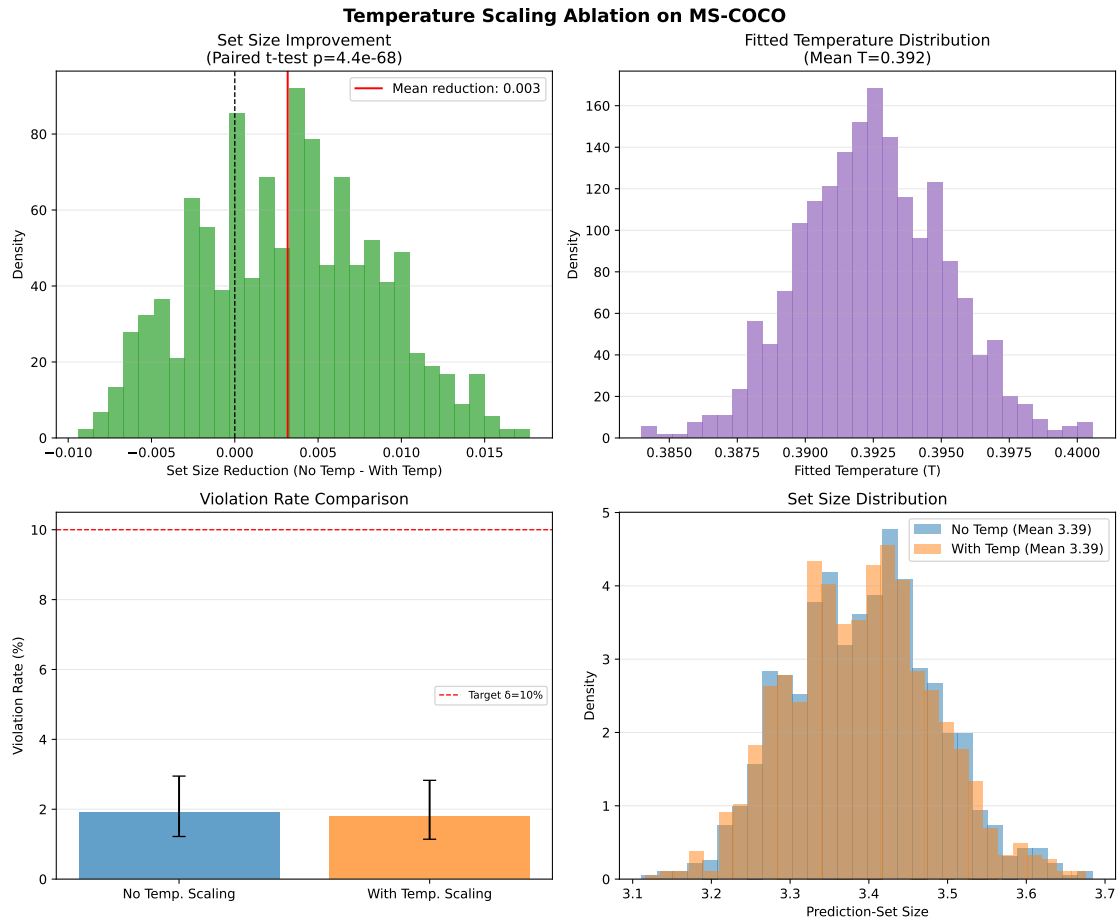

Figure 8. Temperature scaling ablation on MS-COCO. Comparison of BQ-SRC with and without temperature scaling [15] shows minimal reduced set sizes while maintaining validity.
